1 **Anomalous incisor morphology indicates tissue-specific roles for *Tfap2a* and *Tfap2b* in**  
2 **tooth development**

3

4 Emily D. Woodruff<sup>a,d\*</sup>, Galaxy C. Gutierrez<sup>a</sup>, Eric Van Otterloo<sup>b,e</sup>, Trevor Williams<sup>b</sup>, Martin  
5 J. Cohn<sup>a,c\*</sup>

6 <sup>a</sup> Department of Biology, University of Florida, Gainesville, Florida, USA

7 <sup>b</sup> Department of Craniofacial Biology, University of Colorado Anschutz Medical Campus,  
8 Denver, Colorado, USA

9 <sup>c</sup> Department of Molecular Genetics and Microbiology, University of Florida, Gainesville,  
10 Florida, USA

11 <sup>d</sup> Present address: Department of Human Genetics, University of Utah, Salt Lake City, Utah,  
12 USA

13 <sup>e</sup> Present address: Iowa Institute for Oral Health Research, College of Dentistry, University of  
14 Iowa, Iowa City, Iowa, USA

15

16 \* Correspondence to: [ewoodruff@genetics.utah.edu](mailto:ewoodruff@genetics.utah.edu) (EDW) or [mjcohn@ufl.edu](mailto:mjcohn@ufl.edu) (MJC)

17

18

19 **Highlights**

20 1) Late-migrating cranial neural crest cells contribute extensively to the developing molar tooth  
21 germs but minimally to the incisors.

22 2) During tooth development, transcription factors *Tfap2a* and *Tfap2b* are expressed in spatially  
23 and temporally dynamic patterns and differ between incisor and molar tooth germs.

24 3) Epithelial expression of *Tfap2a* and *Tfap2b* is necessary for incisor development, but  
25 mesenchymal expression of these genes is not required.

## 26 **Abstract**

27 Mice possess two types of teeth that differ in their cusp patterns; incisors have one cusp and  
28 molars have multiple cusps. The patterning of these two types of teeth relies on fine-tuning of the  
29 reciprocal molecular signaling between dental epithelial and mesenchymal tissues during  
30 embryonic development. Here we show that the incisors are populated only at early time points  
31 by the neural crest, whereas the molars continue to receive contributions at later stages, revealing  
32 a temporal difference that could alter epithelial-mesenchymal signaling dynamics between these  
33 two types of teeth. The AP-2 transcription factors, particularly *Tfap2a* and *Tfap2b*, are essential  
34 components of such epithelial-mesenchymal signaling interactions that coordinate craniofacial  
35 development in mice and other mammals, but little is known about their roles in the regulation of  
36 tooth development and shape. We demonstrate that incisors and molars differ in their temporal  
37 and spatial expression of *Tfap2a* and *Tfap2b*; in particular, at the bud stage, *Tfap2a* is expressed  
38 in both the epithelium and mesenchyme of the incisors and molars but expression of *Tfap2b* is  
39 restricted to the mesenchyme of the molars. Tissue-specific deletions show that loss of the  
40 epithelial domain of *Tfap2a* and *Tfap2b* affects the number and spatial arrangement of the  
41 incisors, notably resulting in duplicated lower incisors. In contrast, deletion of these two genes in  
42 the mesenchymal domain has little effect on tooth development. Collectively these results  
43 implicate epithelial expression of *Tfap2a* and *Tfap2b* in dorsal-ventral patterning of the incisors  
44 and suggest that these genes contribute to morphological differences between anterior (incisor)  
45 and posterior (molar) teeth within the mammalian dentition.

46

47 **Keywords:** AP-2, odontogenesis, incisor, molar, cranial neural crest

48

## 49 **1. Introduction**

50 Embryonic development of the tooth crown is divisible into four morphologically distinct  
51 stages: initiation, bud, cap, and bell stages (Jernvall and Thesleff, 2012; Tucker and Sharpe,  
52 2004) (Figure 1). Teeth arise from a series of molecular and physical interactions between  
53 epithelial and mesenchymal tissues in the oral cavity (Kollar and Baird, 1969; Lumsden, 1988;  
54 Mina and Kollar, 1987). The dental epithelium and mesenchyme originate from different  
55 embryonic tissues; the dental epithelium is derived from the oral epithelium whereas the dental  
56 mesenchyme is derived predominantly from the cranial neural crest cells (CNCCs), with a minor

57 component coming from the head mesoderm (Chai et al., 2000; Douarin and Kalcheim, 1999;  
58 Hall, 2009; Lumsden, 1988, 1987; Mina and Kollar, 1987; Rothová et al., 2011). Mutations that  
59 affect these tissue interactions (e.g., *Pitx2*, *Msx1*, and *Pax9*) can cause profound disruptions to  
60 the development of the human dentition, including loss, gain, or mis-patterning of teeth (Alappat  
61 et al., 2003; Chen et al., 1996; Dressler et al., 2010; Mostowska et al., 2003; Peters et al., 1998;  
62 Satokata and Maas, 1994).

63 In mice, regionalization of the dentition into presumptive incisor and molar domains  
64 occurs between embryonic day (E) 9 and E10, when CNCCs, which comprise the majority of the  
65 branchial arch mesenchyme, reach the end of their migration into the first branchial arch  
66 (Lumsden, 1988; Chai et al., 2000). During the bud stage (E12.5-E13.5), the dental epithelium  
67 proliferates into the dental mesenchyme, which condenses around the epithelial bud (Figure 1).  
68 In the cap stage (E14.5), the dental epithelium continues to proliferate around the condensed  
69 dental mesenchyme cells, and the primary enamel knot appears at the center of the invaginating  
70 epithelial bud during the transition from bud to cap stages (E13.5-E14.5) (Cho et al., 2007;  
71 Jernvall et al., 1994; Vaahtokari et al., 1996). The enamel knot, a transient localized cluster of  
72 non-proliferating epithelial cells, is an important signaling center that controls tooth shape,  
73 specifically the pattern of cusps on the tooth (Jernvall et al., 1994; Vaahtokari et al., 1996). In  
74 teeth with multiple cusps, the primary enamel knot is thought to direct the formation of other  
75 subsequent enamel knots that are associated with individual tooth cusps (Jernvall et al., 1994;  
76 Jernvall and Thesleff, 2012; Luukko et al., 2003; Thesleff et al., 2001). The bell stage (E16.5-  
77 18.5) is the final stage in embryonic dental development in which the occlusal cusp pattern takes  
78 its final shape, molecularly determined by the enamel knots and the folding of the inner enamel  
79 epithelium. In the inner enamel epithelium, differentiation ensues and the resulting ameloblasts  
80 secrete enamel matrix, while dental mesenchymal cells differentiate into odontoblasts which  
81 form the dentine and inner pulp (Nanci, 2013).

82 In addition to initiating odontogenesis and inducing the cell types that produce dental  
83 tissues, epithelial-mesenchymal tissue interactions are essential for the formation of  
84 morphologically distinct tooth types within the dentition (Kollar and Baird, 1969; Lumsden,  
85 1988; Mina and Kollar, 1987). Most mammals, including humans, possess multiple differently-  
86 shaped teeth which are associated with specific dietary specializations in some species. Mice, for  
87 example, have two different types of teeth in their dentition: two anterior upper and lower

88 incisors, which each have a single cusp, and six posterior upper and lower molars which are  
89 multi-cusped. The genetic basis for tooth development has been well-studied in mice, with  
90 considerable emphasis on the formation of cusps on the molar crown (Ahn et al., 2010;  
91 Harjunmaa et al., 2012; Jernvall et al., 1994; Pispá et al., 1999; Thesleff et al., 2001) and the  
92 ever-growing properties of murine incisors (Harada et al., 2002; Klein et al., 2008; Tummers and  
93 Thesleff, 2003). Less attention has been paid, however, to incisor crown formation, and  
94 relatively few studies have explicitly compared gene expression patterns between developing  
95 incisors and molars (Hu et al., 2013; Huang et al., 2014; Laugel-Haushalter et al., 2013; Tucker  
96 et al., 1998b).

97         Here we used an inducible lineage tracing approach in mice and uncovered striking  
98 differences in the timing of neural crest cell contribution between incisors and molars. To  
99 investigate these differences further, we compared the molecular identities of incisors and molars  
100 in the context of two AP-2 paralogs, *Tfap2a* and *Tfap2b*. Both genes are members of the  
101 activator protein-2 (AP-2) family of transcription factors (Williamson et al., 1996), of which five  
102 AP-2 proteins are known in mammals, AP-2 $\alpha$  - AP-2 $\epsilon$  (Eckert et al., 2005). AP-2 transcription  
103 factors are expressed early in development in the neural crest and they are known to play an  
104 essential role in craniofacial development in numerous vertebrate species, including mice,  
105 zebrafish, and chickens (Brewer et al., 2004; Brewer and Williams, 2004; de Croze et al., 2011;  
106 Hoffman et al., 2007; Knight et al., 2005; Li and Cornell, 2007; Mitchell et al., 1991; Nottoli et  
107 al., 1998; Van Otterloo et al., 2018; Zhang et al., 1996); however, little is known about their roles  
108 in tooth development. Recent transcriptional profiling studies of developing teeth in mice  
109 (Laugel-Haushalter et al., 2013), humans (Huang et al., 2014), and minipigs (Wang et al., 2014)  
110 have identified expression of many genes, including *Tfap2a* (Wang et al., 2014) and *Tfap2b*  
111 (Laugel-Haushalter et al. 2013; Wang et al., 2014). Expression of *Tfap2b* was also reported in  
112 the dental mesenchyme of mouse molars at bud-bell stages (Tanasubsinn et al., 2017; Uchibe et  
113 al., 2012) contradicting results from an earlier study in which *Tfap2a* was detected in tooth  
114 germs but *Tfap2b* was reported as absent (Moser et al., 1997). These earlier investigations of AP-  
115 2 expression in teeth were limited to molars and results were not reported for incisors, with the  
116 exception of one study that showed a lack of *Tfap2b* expression in murine upper incisors  
117 (Tanasubsinn et al., 2017). Finally, several human genetic studies have identified dental  
118 anomalies in patients with *Tfap2a* and *Tfap2b* mutations, which cause the human syndromic

119 disorders branchio-oculo-facial syndrome and Char syndrome, respectively (Milunsky et al.,  
120 2008; Satoda et al., 2000; Tanasubsinn et al., 2017). The relevance of *Tfap2a* and *Tfap2b* to  
121 human disease underscores the need for a detailed characterization of the expression domains  
122 and tissue-specific functions of AP-2 genes during dental development.

123 To this end, we compared spatiotemporal differences in the expression of both *Tfap2a*  
124 and *Tfap2b* between incisors and molars throughout tooth development and used mouse  
125 conditional genetics to determine the tissue-specific roles of these genes in dental epithelium and  
126 mesenchyme of each tooth class. Though *Tfap2a* and *Tfap2b* are expressed in epithelial and  
127 mesenchymal tissues during tooth development, we find that epithelial-specific loss of *Tfap2a*  
128 and *Tfap2b* resulted in a loss or reduction of upper incisors along with a duplication of lower  
129 incisors, but deletion of these genes in the neural crest-derived mesenchyme did not perturb  
130 dental development. Despite major impacts on incisor development following epithelial loss of  
131 *Tfap2a* and *Tfap2b*, molar development was essentially unaffected. Collectively, our results  
132 identify a novel role for *Tfap2* family members in dental development.

133

## 134 **2. Materials and Methods**

### 135 **2.1 Mice**

136 All animal procedures were conducted under strict accordance of all applicable  
137 guidelines and regulations, following the ‘Guide for the Care and Use of Laboratory Animals of  
138 the National Institutes of Health’. In addition, all animal experiments conducted were approved  
139 by the Institutional Animal Care and Use Committees of the University of Florida or the  
140 University of Colorado – Denver, depending on the mouse line used (further outlined below).

141 ICR (CD-1) “wild-type” laboratory mice (Envigo) were used for histology and *in situ*  
142 hybridization experiments. Two transgenic strains (Jackson Laboratory) were used to perform  
143 lineage tracing studies on neural crest cells, *CBA;B6-Tg(Sox10-icre/ERT<sup>2</sup>)<sup>388Wdr/J</sup>* (JAX stock  
144 number 027651, abbreviated *Sox10-iCre/ERT<sup>2</sup>*) (McKenzie et al., 2014), and  
145 *Gt(ROSA)26Sor<sup>tm4</sup>(ACTB-tdTomato,-EGFP)Luo* (JAX stock number 007576, abbreviated *R26R<sup>mTmG</sup>*)  
146 (Muzumdar et al., 2007). CD-1, *Sox10-iCre/ERT<sup>2</sup>*, and *R26R<sup>mTmG</sup>* mice were housed in the  
147 University of Florida Animal Care Services barrier facility. All *Tfap2a* and *Tfap2b* mutant lines  
148 were housed at the University of Colorado- Denver. Mice had access to food and water *ad*

149 *libitum*. For all timed matings, the day on which a copulatory plug was detected in the female,  
150 the embryos were denoted as E0.5.

151 At the appropriate developmental stage, embryos were collected by first euthanizing the  
152 pregnant dam, dissecting out the uterine horn, removing the embryos from the uterine muscle  
153 and extraembryonic tissue in ice-cold phosphate buffered saline (PBS) or PBS treated with  
154 diethyl-pyrocabonate (DEPC-PBS). Embryos were staged according to embryonic days as  
155 previously described (Kaufman, 1992; Martin, 2002) and processed in a manner contingent on  
156 their downstream application (described below). A small portion of the extraembryonic yolk-sac  
157 or tail snippet of the dissected embryo was saved for DNA extraction and genotyping. All adult  
158 mice and embryos in this study were genotyped using polymerase chain reaction (PCR) (see  
159 Supplementary Table 1 for primer sequences).

160

## 161 **2.2 Lineage tracing of *Sox10*-expressing neural crest cells**

162 To follow cranial neural crest cells (CNCCs) and their derivatives from their original  
163 location in the neural crest to their final destinations in the face and jaw, including the teeth, we  
164 crossed male mice heterozygous for a tamoxifen-inducible *Cre* allele driven by the *Sox10*  
165 promoter (*Sox10-iCre/ER<sup>T2</sup>*) (McKenzie et al., 2014) with females heterozygous or homozygous  
166 for double-fluorescent *Cre* reporter alleles (*R26R<sup>mTmG/wt</sup>* or *R26R<sup>mTmG/mTmG</sup>*) (Muzumdar et al.,  
167 2007) (see Supplementary Methods 5.1 for details). In embryos from this cross, *Sox10-iCre*-  
168 positive CNCCs and their derivatives were EGFP-positive. Migrating CNCCs express *Sox10* but,  
169 *Sox10* is not expressed in the head mesoderm or facial epithelium during this time (Anderson et  
170 al., 2006; Britsch et al., 2001; Jacques-Fricke et al., 2012; McKenzie et al., 2014; Ota et al.,  
171 2004; Soo et al., 2002), making it a suitable genetic marker for labeling CNCCs in the teeth.

172 In the first lineage tracing experiment, pregnant female mice were administered  
173 tamoxifen (see Supplementary Methods 5.1) to induce *Cre*-mediated recombination on one day  
174 when the embryos were at stage E6.5, E7.5, or E8.5. In the second experiment, tamoxifen was  
175 administered on three consecutive days from E6.5-8.5. Results are based on a minimum of 3  
176 embryos for each time point in each experiment. Membrane fluorescence for EGFP and  
177 tdTomato was visualized in frontal cryosections using a Zeiss LSM 710 confocal microscope.

178

## 179 **2.3 Conditional Deletion of *Tfap2a* and *Tfap2b***

180 To generate *Tfap2* mutant embryos, we used conditional floxed or null alleles of *Tfap2a*  
181 and *Tfap2b* and two strains in which *Cre* recombinase was expressed in either the epithelium,  
182 *Crect* (Schock et al., 2017), or the neural crest, *Wnt1-Cre* (Danielian et al., 1998). Males were  
183 heterozygous for either the epithelial or neural crest *Cre* allele and the *Tfap2a* and *Tfap2b*  
184 conditional alleles (*i.e.*, *Tfap2a<sup>flox/wt</sup>;Tfap2b<sup>flox/wt</sup>;Wnt1-Cre* or *Tfap2a<sup>flox/wt</sup>;Tfap2b<sup>flox/wt</sup>;Crect*)  
185 and females were homozygous for the conditional alleles (*i.e.*, *Tfap2a<sup>flox/flox</sup>;Tfap2b<sup>flox/flox</sup>*). Both  
186 conditional alleles have been previously described, including, *Tfap2a<sup>tm2Will/J</sup>* (the *Tfap2a* floxed  
187 conditional allele) (Brewer et al., 2004) and *Tfap2b<sup>tm2Will</sup>* (the *Tfap2b* floxed conditional allele)  
188 (Martino et al., 2016; Seberg et al., 2017; Van Otterloo et al., 2018). In the second cross, males  
189 were heterozygous for conditional null alleles of *Tfap2a* (Zhang et al., 1996), and *Tfap2b*  
190 (Martino et al., 2016; Seberg et al., 2017; Van Otterloo et al., 2018), (*i.e.*,  
191 *Tfap2a<sup>null/wt</sup>;Tfap2b<sup>null/wt</sup>;Wnt1-Cre* or *Tfap2a<sup>null/wt</sup>;Tfap2b<sup>null/wt</sup>;Crect*) and females were  
192 homozygous for the conditional alleles. In double mutant embryos from the first cross (*i.e.*,  
193 *Tfap2a<sup>flox/flox</sup>;Tfap2b<sup>flox/flox</sup>;Cre+*), *Tfap2a* and *Tfap2b* were deleted in the *Cre*-positive tissue  
194 (epithelium or CNC-derived mesenchyme) (Supplementary figure 1 A, B). In the second cross,  
195 double mutant embryos (*i.e.*, *Tfap2a<sup>null/flox</sup>;Tfap2b<sup>null/flox</sup>;Cre+*) lacked both alleles of *Tfap2a* and  
196 *Tfap2b* in the *Cre*-positive tissue and were heterozygous for *Tfap2a* and *Tfap2b* in the rest of the  
197 embryo (Supplementary figure 1 C, D) (see Supplementary Methods 5.2 for additional details on  
198 tissue-specific deletions). For embryos examined from both *Crect* and *Wnt1-Cre* crosses,  
199 genotypes, phenotypes, and sample sizes are provided in Supplementary table 2.

200

#### 201 **2.4 Tissue preparation, cryosectioning, and histology**

202 Tissue was prepared for cryosectioning as follows: mouse heads were fixed overnight in  
203 4% PFA at 4°C, equilibrated in 15% - 30% sucrose in PBS on ice for ~3 hours or overnight  
204 depending on the stage, and placed in a solution with equal amounts of OCT and sucrose (30%  
205 sucrose) at 4°C overnight. Heads were embedded in OCT, frozen on dry ice, and stored at -80°C.  
206 10µm sections in the frontal (coronal) plane were cut using a Leica cryostat and mounted on  
207 Superfrost Plus Gold slides (Thermo Fisher Scientific) (for *in situ* hybridization only) or on  
208 Superfrost Plus slides (Thermo Fisher Scientific) and stored at -80°C. Histological staining was  
209 performed on cryosections using 10% neutral buffered formalin to post-fix tissue, Mayer's  
210 hematoxylin (Electron Microscopy Sciences), Eosin-Y alcoholic (Fisher Scientific), and Scott's

211 solution (10g/L MgSO<sub>4</sub> + 2g/L NaHCO<sub>3</sub> + tap water). Sections were dehydrated with ethanol,  
212 then Xylene, mounted with Permount (Fisher Scientific), and covered with glass coverslips  
213 (Thermo Fisher Scientific).

214

## 215 **2.5 Design and cloning of RNA probes for *in situ* hybridization**

216 Mouse (*Mus musculus*) messenger RNA (mRNA) sequences for genes of interest  
217 (*Tfap2a*, *Tfap2b*, *Yeats4*, *Kctd1*, *Ets1*) were obtained from NCBI GenBank  
218 (<http://www.ncbi.nlm.nih.gov/genbank/>). Oligonucleotide primers (Supplementary table 3) were  
219 designed in Geneious (v6.1.8 or 10.0.9, Biomatters, Ltd) and target sequences were PCR-  
220 amplified from cDNA or genomic DNA from CD-1 mice, ligated into vectors, and cloned (see  
221 Supplementary Methods 5.2 for details). “Sense” (negative control) and “antisense”  
222 (experimental) digoxigenin (DIG)-labeled RNA probes were synthesized from the target DNA,  
223 purified, and quantified (see Supplementary Methods 5.3).

224

## 225 **2.6 RNA *in situ* hybridization on cryosections**

226 *In situ* hybridization (ISH) was performed as described previously (Acloque et al., 2008)  
227 with some modifications (see Supplementary Methods 5.4 for a complete description).  
228 Expression patterns reported here for each gene of interest were detected in a minimum of 3  
229 embryos per stage. The expression patterns of these genes had been previously documented in  
230 some region in the head (often in the brain or the eye) and these tissues/regions were used as  
231 positive controls (Supplementary figure 2 A-G). Negative controls were also conducted for each  
232 gene of interest (Supplementary figure 2 H-L).

233

## 234 **2.7 Micro-CT scanning and 3-D reconstruction of *Tfap2* mutant and control embryos.**

235 Mouse embryos were prepared for micro-CT ( $\mu$ CT) using Lugol’s iodine solution for  
236 contrast-enhancement (see Supplementary Methods 5.5). Embryos were scanned in a GE  
237 V|TOME|X M 240 Nano CT scanner (General Electric) at the University of Florida Nanoscale  
238 Research Facility. Tiff stacks were generated using Phoenix Datos2 software (General Electric)  
239 and VG Studio Max (Volume Graphics) was used for 3-D reconstructions.

240

## 241 **2.8 Quantification and analysis of molar occlusal dimensions**



242 The first upper and lower molar teeth ( $M^{1/1}$ ) from both left and right sides were measured  
243 in VG Studio Max (5 replicate measurements/tooth). Length:width ratios were compared to  
244 previously published measurements collected from wild populations of mice, *Mus musculus*  
245 *musculus* (Csanady and Mosansky, 2018; Wallace, 1968). The use of ratios in these comparisons  
246 eliminates the effect of differences in overall tooth size. The molar ratios of the control embryos  
247 were within the range of those previously calculated for wild mice (Csanady and Mosansky,  
248 2018), and, lacking replicate 3-D data sets, we reasoned that in a larger sample of our laboratory  
249 mouse strains, the variance would be similar to that of wild *M. musculus*. Based on this  
250 assumption, we used the largest standard deviation from the wild-type data set ( $\pm 0.08$ ,  $N=101$ )  
251 (Csanady and Mosansky, 2018) to conservatively estimate hypothetical distributions of length  
252 and width measurements for both control and mutant mice from *Crect* and *Wnt1-Cre* crosses  
253 (Supplementary table 4). Distributions composed of 100 molar length and width measurements  
254 were generated in R (v3.6.0) using the *runif* function, which pseudo-randomly generates values  
255 between specific minimum and maximum values. Molar ratios (length:width) were calculated  
256 from these distributions and the data were tested for normality using the Shapiro-Wilks test  
257 (*shapiro.test* in R). On account of the data being non-normally distributed, the Wilcox-signed  
258 rank test (*wilcox-test* in R) was employed to compare simulated molar ratios between the mutant  
259 and control embryos.

260

### 261 **3. Results**

#### 262 **3.1 Cranial neural crest cells complete their migration to the incisor region prior to the** 263 **molar region**

264 It is well understood that CNCCs populate the embryonic dental mesenchyme just prior  
265 to the initiation of tooth development and that they are important for epithelial-mesenchymal  
266 signaling (Chai et al., 2000; Douarin and Kalcheim, 1999; Hall, 2009; Imai et al., 1996;  
267 Lumsden, 1988, 1987; Mina and Kollar, 1987; Rothová et al., 2011) but the timing of CNCCs'  
268 arrival into the presumptive incisor (anterior) and molar (posterior) regions is unknown. To  
269 address this, we performed lineage tracing of *Sox10*-expressing CNCCs into the developing  
270 incisor and molar teeth. Based on previous work (Imai et al., 1996) we hypothesized that the  
271 anterior odontogenic (future incisor) region would be colonized by CNCCs before the more  
272 posterior (molar) odontogenic region. *Sox10*-positive cells were labeled using a tamoxifen-

273 inducible transgenic mouse line, *Sox10-iCre/ER<sup>T2</sup>* (McKenzie et al., 2014), crossed with an  
274 *R26R<sup>mTmG</sup>* fluorescent reporter (Muzumdar et al., 2007). Migration of CNCCs begins at  
275 approximately E7.5, therefore, we administered tamoxifen at E6.5, E7.5, or E8.5 to induce *Cre*-  
276 recombination in the embryos to label early and late migrating neural crest cells.

277 In *Cre*-positive embryos from mice that were given tamoxifen at E6.5 or E7.5, EGFP-  
278 positive neural crest cells migrated into the mesenchyme of both incisors and molars and make  
279 up the majority of the dental mesenchyme at the late bud stage (E13.5) (Figure 2 A, B, D, E, G,  
280 H). Contrary to our expectations, in embryos exposed to tamoxifen at E6.5, EGFP-positive  
281 CNCCs were broadly distributed in both incisors and molars (Figure 2 A, D, G), implying that  
282 early-migrating crest cells contribute concurrently to both anterior and posterior tooth germs. In  
283 contrast to these early-migrating CNCCs, the contribution of late-migrating cells (labeled with  
284 tamoxifen at E8.5) to the incisors is minimal (Figure 2 C, F), but many late-migrating neural  
285 crest cells were present in the molar mesenchyme (Figure 2 I). These results show that late-  
286 migrating CNCCs contribute to the molar mesenchyme, but relatively few of these cells migrate  
287 further anteriorly into the incisor mesenchyme. In embryos from female mice given three  
288 consecutive doses of tamoxifen (E6.5-E8.5), which labels crest cells throughout the majority of  
289 their migratory period, results were similar to those of the single day labeling at E6.5 and E7.5  
290 (Supplementary figure 3), and no differences were observed between tooth types in the three-day  
291 labeling experiment. Collectively, the results of the lineage tracing analyses suggest that early-  
292 migrating (*i.e.*, E6.5, E7.5) CNCCs contribute to both incisor and molar mesenchyme but late-  
293 migrating (*i.e.*, E8.5) CNCCs continue to populate the molar mesenchyme.

294

### 295 **3.2 Incisors and molars differ in temporal and spatial expression of *Tfap2a* and *Tfap2b***

296 To further investigate neural crest contributions to incisor and molar development, we  
297 chose to study the expression of two AP-2 genes, *Tfap2a* and *Tfap2b* because this transcription  
298 factor family is part of the regulatory network driving neural crest development in many species  
299 (Mitchell et al., 1991; Moser et al., 1997; Sauka-Spengler and Bronner-Fraser, 2008; Simões-  
300 Costa and Bronner, 2015). To determine the spatial and temporal expression of *Tfap2a* and  
301 *Tfap2b* we compared mRNA localization in mouse incisors and molars at E12.5-E13.5 (bud  
302 stage), E14.5 (cap stage), and E16.5 (early bell stage) using *in situ* hybridization.

303 *Tfap2a* expression was detected throughout the bud and cap stages in the dental  
304 epithelium and mesenchyme of both the incisor and the molar buds (Figure 3 A-C, G-I, M-O). In  
305 contrast, *Tfap2b* was not detected in the incisors (epithelium or mesenchyme) until the late bud  
306 stage (E13.5) when minimal expression was observed in the incisor epithelium (Figure 3 D-E, J-  
307 K), and in some embryos expression was not detected, suggesting that at E13.5 *Tfap2b*  
308 transcripts were just beginning to accumulate in the incisor buds. In the molar buds, however,  
309 *Tfap2b* was expressed in the mesenchyme during this time (E12.5-E13.5) (Figure 3 F, L), and  
310 this expression persisted in the cap stage molars (Figure 3 R), consistent with previous reports  
311 (Tanasubinn et al., 2017; Uchibe et al., 2012). At the cap stage *Tfap2b* was also faintly detected  
312 in the incisors (Figure 3 P, Q), the oral and facial epithelia, and the mesenchyme surrounding the  
313 nasal cavity (Figure 3 P, J; Supplementary figure 2 E, G).

314 In contrast to earlier stages, few *Tfap2a* transcripts were detected in the lower incisor  
315 epithelium at the early bell stage (E16.5) (Figure 4 E) while in the upper incisor *Tfap2a* was  
316 expressed in the epithelium and the mesenchyme (Figure 4 A). In bell stage molars, however,  
317 *Tfap2a* expression was restricted to the inner enamel epithelium directly adjacent to the dental  
318 mesenchyme (Figure 4 I, M). In early bell stage incisors, *Tfap2b* transcripts were detected  
319 prominently within epithelial-derived ameloblasts and faintly in the mesenchyme (Figure 4 B,  
320 F); however, in the molars, *Tfap2b* expression became limited to mesenchymal cells closer to the  
321 outer regions of the tooth germ (Figure 4 J, N). At all stages examined, *Tfap2a* was also  
322 prominently expressed in the oral epithelium and/or surface epithelium (Figure 3 A-C, G-I, M-O;  
323 Figure 4 A, E), in agreement with previous studies (Zhang and Williams, 2003; Zhao et al.,  
324 2011).

325 We next asked whether *Tfap2a* and *Tfap2b* expression in molars and incisors is  
326 associated with *Yeats4*, which encodes an AP-2 activator protein (Ding et al., 2006) and *Kctd1*  
327 which encodes an AP-2 inhibitor (Ding et al., 2009). *Yeats4* transcripts were detected in the  
328 epithelium of both the incisor and molar buds at E13.5 (Supplementary figure 4 A-C). *Kctd1* was  
329 expressed robustly in bud-stage upper incisor epithelium and to a lesser extent in the  
330 mesenchyme but minimal expression was detected in the lower incisors (Supplementary figure 4  
331 D, E). In the molars at E13.5, *Kctd1* transcripts are present in the epithelium (Supplementary  
332 figure 4 F). By the cap stage, transcripts of both *Yeats4* and *Kctd1* were detected in epithelium

333 and mesenchyme within the incisors and molars (Supplementary figure 4 G-I, J-L) similar to  
334 *Tfap2a* and, to a lesser extent, *Tfap2b* (mesenchyme only).

335 At the early bell stage, *Yeats4* expression was restricted to the incisors where it was  
336 localized to epithelium-derived ameloblasts (Figure 4 C, G), similar to that of *Tfap2b*, but unlike  
337 *Tfap2b* it was also detected in the epithelium in the molars (Figure 4 K, O). In contrast, *Kctd1*  
338 expression was visible in only a few cells in early bell stage incisors and some embryos showed  
339 no staining at this stage (Figure 4 D, H). In the molars, however, epithelial expression of *Kctd1*  
340 persisted but mesenchymal expression was no longer detectable (Figure 4 L, P).

341 We then compared these patterns with *Ets1* which, like *Tfap2a* and *Tfap2b* is also  
342 expressed in migrating CNCCs where it has been shown to act downstream of *Tfap2a* in the  
343 chick (Barembaum and Bronner, 2013). *Ets1* expression was detected in the mesenchyme at cap  
344 and early bell stages in the incisors (Supplementary figure 5 A, B, E, F) and in the molars  
345 (Supplementary figure 5 C, G, H) but its expression was punctate, particularly in the molars. At  
346 the early bell stage *Ets1* transcripts were also observed in the dental epithelium. Comparison of  
347 *Ets1* expression with comparable histological sections revealed similarities between *Ets1*-  
348 expressing cells and erythrocytes with respect to cell shape and distribution within the tooth  
349 germ (Supplementary figure 5 D).

350 In summary, *Tfap2a*, *Kctd1*, and *Yeats4* exhibit similar expression patterns at bud-cap  
351 stages (E13.5 and E14.5), particularly in the dental epithelium of the incisors and molars,  
352 however, expression of *Tfap2b* is similar to the others only at E14.5 in the incisor epithelium and  
353 the molar mesenchyme. By the early bell stage (E16.5) expression patterns of these genes differ  
354 considerably from one another with the exception of *Tfap2b* and *Yeats4* which are expressed in  
355 similar patterns in the ameloblast layer in the incisors. We did not detect similar expression  
356 patterns for *Ets1* and *Tfap2a/Tfap2b* in incisors or molars. In all ISH assays negative (sense)  
357 controls for each probe produced no signal (Supplementary figure 2 H-L).

358

### 359 **3.3 Epithelial deletion of *Tfap2a* and *Tfap2b* leads to misshapen teeth and extra incisors**

360 The dynamic expression patterns of both *Tfap2a* and *Tfap2b* in the dental epithelium and  
361 mesenchyme suggested that these factors could play tissue-specific roles in tooth development.  
362 To test whether epithelial-specific expression of *Tfap2a* and *Tfap2b* was required for the  
363 development of properly shaped teeth, we used an epithelial-specific *Cre* recombinase allele,

364 *Crect* (Schock et al., 2017). Mutant embryos were homozygous for *Tfap2a* and *Tfap2b*  
365 conditional alleles and heterozygous for the *Crect* transgene (*Tfap2a<sup>lox/lox</sup>;Tfap2b<sup>lox/lox</sup>;Crect*),  
366 resulting in deletion of *Tfap2a* and *Tfap2b* exclusively from the ectoderm, including the  
367 presumptive dental epithelium (Supplementary figure 1 A).

368 In E18.5 control embryos, hemi-mandibles possess a single upper and single lower  
369 incisor ( $I^1/1$ ) and first and second upper and lower molars ( $M^1/1$ ,  $M^2/2$ ) (Figure 5 A, C, F, I, K;  
370 Supplementary figure 6 F). By contrast, the most striking difference in E18.5 embryos lacking  
371 *Tfap2a* and *Tfap2b* in the epithelium were changes in the number and/or morphology of the  
372 lower incisors (Supplementary table 2). In some instances, the mutants displayed an additional  
373 lower incisor ventral to  $I_1$  (N=2/4 embryos) (Figure 5 B). Note that this phenotype was  
374 consistently observed in both the left and right hemi-mandibles of the mutants. Morphologically  
375 these additional teeth looked similar to  $I_1$  and histological analysis revealed that a complete  
376 repertoire of differentiated cell types were present in this supernumerary incisor, including  
377 enamel-forming ameloblasts and dentin-forming odontoblasts (Figure 5 B, B').  $\mu$ CT scanning  
378 and subsequent 3-D reconstruction and histological analysis showed that the mutants that lacked  
379 duplicated incisors had an aberrantly shaped lower incisor ( $I_1$ ) that exhibited ventral curvature  
380 (N=2/4 embryos) (Figure 5 M, O; Supplementary figure 7 C-D); this phenotype was also  
381 bilaterally symmetrical and was observed in both right and left hemi-mandibles.

382 The face of the epithelium-specific mutants was highly dysmorphic (Van Otterloo et al.,  
383 unpublished observations) which made it difficult to assess the development of the upper  
384 incisors. In some mutants, upper incisors were not observed at E18.5 (N=3/4 embryos)  
385 (Supplementary figure 6 G-I), but in one embryo we observed two small incisors though they  
386 were considerably shorter than those in the control (Figure 5 M, O; Supplementary figure 7 A-B;  
387 Supplementary table 2). In contrast to the incisors, the first and second upper and lower molars in  
388 the mutants were structurally similar to those of the controls, as assessed by histology (Figure 5  
389 D, E, G, H). 3-D reconstructions from  $\mu$ CT scans and subsequent quantification of molar size  
390 (see Results 3.5), however, revealed that in mutants the molars were shorter along the  
391 mesiodistal axis and the cusps appeared less well defined than in the controls (Figure 5 N, P;  
392 Supplementary table 4).

393 We also examined mutant mice from a similar genetic cross in which one of the  
394 conditional alleles was null (*Tfap2a<sup>lox/null</sup>;Tfap2b<sup>lox/null</sup>;Crect*). In these mutants, we observed the

395 same duplicated incisor phenotype in the lower incisors as in the first cross (Supplementary  
396 figure 8 D, E; Supplementary table 2), and one upper incisor was present (Supplementary figure  
397 8 B). We also noted that the molars in these compound mutants were similar to the controls  
398 suggesting that the loss of one allele of each gene in the mesenchyme did not exacerbate the  
399 epithelium-specific mutant phenotype (Supplementary figure 8 F-K).

400 To determine how this supernumerary lower incisor develops, we also examined  
401 histological sections of cap stage (E14.5) teeth from *Tfap2a<sup>fllox/fllox</sup>;Tfap2b<sup>fllox/fllox</sup>;Crect* embryos.  
402 In hemi-mandibles from E14.5 control embryos (*Tfap2a<sup>fllox/wt</sup>;Tfap2b<sup>fllox/wt</sup>;Crect*), one cap stage  
403 lower incisor is present attached to the dental lamina (Figure 6 A), but in mutants, duplicated cap  
404 stage incisors were observed (N=2/3). In the mutants, I<sub>1</sub> appeared tethered to the dorsal dental  
405 lamina (Figure 6 B, D) as in the controls, but the duplicated (ventral) incisor was tethered to the  
406 ventral surface epithelium, a region that does not normally have the characteristics of the dental  
407 lamina (Figure 6 C, E). In the mutant embryo lacking an extra cap-stage incisor, a bud emanating  
408 from the ventral surface epithelium was observed, indicating that this extra tooth was likely  
409 developmentally delayed compared to I<sub>1</sub> (data not shown). Consistent with our observations at  
410 E18.5, upper incisors were not observed in *Tfap2a<sup>fllox/fllox</sup>;Tfap2b<sup>fllox/fllox</sup>;Crect* embryos at E14.5  
411 (Supplementary figure 6 B-E) indicating that they failed to form prior to E14.5, at either the  
412 initiation or bud stage. Altogether, these results revealed a critical role for epithelial *Tfap2a* and  
413 *Tfap2b* function during tooth development.

414

### 415 **3.4 Mesenchymal *Tfap2a* and *Tfap2b* is dispensable for tooth development, despite an** 416 **interaction with ectodermal AP-2 function during jaw formation.**

417 Our findings described above show that *Tfap2a* and *Tfap2b* mRNA expression within the  
418 dental epithelium and/or oral epithelium serves an important function in proper tooth  
419 morphogenesis. Given that robust *Tfap2b* expression was detected in the dental mesenchyme  
420 (Figure 3), as well as some weaker domains, we predicted that AP-2 activity within the cranial  
421 neural crest-derived mesenchyme is also required for normal tooth development. To test this, we  
422 generated mice with conditional deletions of *Tfap2a* and *Tfap2b* in the neural crest-derived  
423 mesenchyme using the *Wnt1-Cre* allele (Danielian et al., 1998) and floxed or null alleles of  
424 *Tfap2a* and *Tfap2b* (Van Otterloo et al., 2018) (Supplementary figure 1 B, D).

425 Unexpectedly, and in contrast to the epithelial-specific loss of *Tfap2a* and *Tfap2b*,  
426 *Tfap2a<sup>fllox/fllox</sup>;Tfap2b<sup>fllox/fllox</sup>;Wnt1-Cre* embryos possessed the correct number of incisors and  
427 molars, and histology and  $\mu$ CT analysis confirmed that both classes of teeth are similar to  
428 controls at the cap E14.5 stage (Figure 7 A-F; Supplementary table 2) and at the bell (E18.5)  
429 stage (Figure 7 G-N). These results were replicated in a second cross with a null allele,  
430 *Tfap2a<sup>fllox/null</sup>;Tfap2b<sup>fllox/null</sup>;Wnt1-Cre*, (Supplementary figure 9 C, D, G, I; Supplementary table  
431 2) and the lack of an apparent incisor phenotype was also noted in a previous study (Van  
432 Otterloo et al., 2018).

433 A midface cleft and mandibular cleft were previously reported in mutant embryos in  
434 which *Tfap2a* and *Tfap2b* were deleted in the neural crest-derived mesenchyme and  
435 heterozygous in the ectoderm (*Tfap2a<sup>fllox/null</sup>;Tfap2b<sup>fllox/null</sup>;Wnt1-Cre*) (Van Otterloo et al., 2018)  
436 and we noted the same phenotype in this study (Supplementary figure 9 E). In contrast, in  
437 embryos with the mesenchyme-specific deletion of *Tfap2a* and *Tfap2b* and wild-type expression  
438 in the epithelium (*Tfap2a<sup>fllox/fllox</sup>;Tfap2b<sup>fllox/fllox</sup>;Wnt1-Cre*), we observed a midface cleft but no  
439 mandibular cleft (Figure 7 K).

440

### 441 **3.5 Loss of *Tfap2a* and *Tfap2b* in either epithelium or mesenchyme leads to shorter molars**

442 Histological analysis showed that loss of *Tfap2a* and *Tfap2b* in either the epithelium or  
443 the mesenchyme had little effect on the molar teeth; however, 3-D reconstructions of E18.5  
444 embryos from both crosses revealed that the molars ( $M^{1/1}$ ) appeared shorter along the  
445 mesiodistal axis in the mutants compared to the controls (Figure 5 N, P; Figure 7 L, N).  
446 Quantification of the occlusal surface of the upper and lower first molars (ratio of molar length to  
447 molar width) from the 3-D reconstructions confirmed that for both crosses, each mutant embryo  
448 has shorter molars than the corresponding control embryo (Supplementary table 4). This  
449 phenotype was internally consistent among left and right sides (4 teeth/individual, although only  
450 one embryo per genotype was  $\mu$ CT-scanned). The molar ratios obtained from the control  
451 embryos, however, fall within the range observed in studies of wild populations of *Mus musculus*  
452 (Csanady and Mosansky, 2018; Wallace, 1968) and furthermore, the mutant  $M^{1/1}$  ratios fall  
453 outside of this range (Supplementary table 4). Given the similarity in molar ratios between the  
454 control embryos and wild mice, we used the standard deviation for  $M^1$  occlusal length from  
455 previously published measurements of wild adult *M. musculus* (Csanady and Mosansky, 2018) to

456 estimate hypothetical distributions of occlusal length and width for our mutant and control mice  
457 and we performed a Wilcoxon-signed rank test to compare control versus mutant molar ratios from  
458 the estimated distributions. The results of this comparison were congruent with our initial  
459 observation that in both crosses, the mutant molars were shorter along the mesial-distal axis than  
460 those of the control embryos ( $p < 2.2 \times 10^{-16}$  alpha = 0.05; the same p-values were obtained for both  
461 crosses). We hypothesize that this difference in tooth length may be linked to the foreshortening  
462 of the snout in mutant embryos (Figure 5 O; Figure 7 M) noted here and in a previous study (Van  
463 Otterloo et al., 2018).

464 Collectively, these findings suggest that a complex interaction occurs between *Tfap2a*  
465 and *Tfap2b* function in the ectoderm (including oral and dental epithelia) and neural crest-  
466 derived mesenchyme during tooth and jaw development. These results also highlight that a  
467 neural crest-specific function for *Tfap2a* and *Tfap2b* is not necessary for embryonic tooth  
468 development.

469

#### 470 **4. Discussion**

##### 471 **4.1 Temporal differences in duration of cranial neural crest migration to molars and** 472 **incisors may influence pre-patterning of the dentition**

473 The dental mesenchyme is a heterogeneous population of cells composed of both neural  
474 crest-derived cells and cells derived from the head mesoderm and the relative contribution of  
475 each of these cell populations to the dental mesenchyme changes during tooth development  
476 (Chai et al., 2000; Imai et al., 1996; Rothová et al., 2011). The origins of the cells that comprise  
477 the dental mesenchyme are of interest because shifts in the proportions of crest-derived or  
478 mesoderm-derived cells could have an effect on patterns of gene expression in the developing  
479 teeth.

480 CNCCs migrate into the branchial arches from approximately E7.5 to E9.0 in mice  
481 (Nichols, 1986, 1981; Theveneau and Mayor, 2012) and they fully invade the first branchial arch  
482 at the same time when the dentition is prepatterned into future incisor and molar regions (E9.5-  
483 E10.5) (Lumsden, 1988). Previous cell fate mapping using *DiI* labeling in rats revealed that early  
484 migrating CNCCs populate anterior regions of the face and jaw, whereas late-migrating CNCCs  
485 populate more posterior regions (Imai et al., 1996). To build upon the results of this earlier study,  
486 we explicitly tested whether there are differences in the neural crest contribution to developing



487 incisors and molars. We performed a time-course lineage tracing experiment in which CNCCs  
488 were labeled at three different time points during migration. Our results show that CNCCs  
489 migrate to the future incisor region and molar regions at ~E7-E8. Late-migrating (E8.5) CNCCs,  
490 however, predominantly populate the molar mesenchyme, while relatively few of these cells  
491 invade the incisor mesenchyme. Labeling CNCCs for the majority of the duration of their  
492 migration produced equivalent results to the E6.5 or E7.5 single-day labeling, further  
493 demonstrating that the temporal difference in neural crest contribution between incisors and  
494 molars is limited to late-migrating crest cells.

495 Earlier experiments in mice established that tissue grafted from E10 frontonasal  
496 prominences gave rise exclusively to incisors, whereas mesenchyme from the maxillary  
497 prominences formed molars (Lumsden and Buchanan, 1986). Additionally, CNCCs that migrate  
498 into the premaxilla and maxilla originate from two different locations in the neural ectoderm; the  
499 premaxilla and incisor mesenchyme are populated by crest cells derived from the forebrain and  
500 midbrain while the maxilla and molar mesenchyme form from crest cells derived from the  
501 midbrain and hindbrain (rhombomeres 1 and 2) (Jiang et al., 2002).

502 Cranial neural crest-derived mesenchyme by itself is insufficient for tooth formation  
503 which requires inductive cues from the dental epithelium and likewise, the epithelium alone is  
504 also unable to produce teeth (Mina and Kollar 1987, Lumsden, 1987, 1988). When considered in  
505 the context of earlier work, our data suggest that the differences in the duration of neural crest  
506 cell migration into the incisor and molar regions may contribute to the anterior-posterior  
507 patterning of the dentition. This difference in duration of migration could affect the molecular  
508 response of the mesenchyme to initial inductive cues from the dental epithelium, essentially  
509 helping to facilitate differential gene expression in anterior versus posterior dental mesenchyme.

510

#### 511 **4.2 Expression patterns of *Tfap2a*, *Tfap2b* differ between incisors and molars during dental** 512 **development**

513 To investigate the potential molecular differences in CNCCs in incisors and molars, we  
514 compared expression patterns of two AP-2 transcription factors which are expressed in neural  
515 crest cells (Mitchell et al., 1991; Moser et al., 1997). Spatiotemporal gene expression analyses  
516 revealed that expression domains of *Tfap2a* and *Tfap2b* differ among incisor, molar, oral  
517 epithelium, and surface epithelial tissues. Differences in expression were observed between

518 incisors and molars as tooth development proceeds from bud, to cap, to bell stage. At the bud  
519 stage (E12.5 and E13.5) and cap stages (E14.5) both genes were expressed in the surface  
520 epithelium, while in the upper and lower incisors *Tfap2a* was expressed prominently in the  
521 dental epithelium compared with weaker expression of *Tfap2b*. In the incisor mesenchyme at the  
522 late bud and cap stages, only *Tfap2a* was observed. Epithelial and mesenchymal *Tfap2a*  
523 expression persisted into the bell stage in the incisors and *Tfap2b* expression became restricted to  
524 the incisor inner enamel epithelium, including ameloblasts.

525 In the molar epithelium, *Tfap2a* was detected but *Tfap2b* was essentially absent at the  
526 bud and cap stages. Conversely, in the molar mesenchyme from the bud through cap stages,  
527 *Tfap2a* and *Tfap2b* were both expressed, albeit weakly for *Tfap2a* and more robustly for *Tfap2b*,  
528 consistent with previous reports (Tanasubsinn et al., 2017; Uchibe et al., 2012). By the bell stage  
529 *Tfap2a* was prominently expressed in the molar inner enamel epithelium while *Tfap2b* was  
530 restricted to molar mesenchyme in the outer region of the tooth germ. Restricted expression of  
531 *Tfap2a* in the molar inner enamel epithelium suggests it may be associated with proliferation or  
532 folding of the molar inner enamel epithelium, which is thought to be regulated by enamel knots  
533 that facilitate the development of multiple cusps on the molar surface (Cho et al., 2007; Matalova  
534 et al., 2005; Thesleff et al., 2001).

535 Previous work showed that YEATS4 increases the transcriptional activity of TFAP2B  
536 (Ding et al., 2006) while KCTD1 inhibits the transcriptional activity of TFAP2A or TFAP2B  
537 (Ding et al., 2009). We detected overlapping expression domains between *Tfap2a*, *Kctd1*, and  
538 *Yeats4* in cap stage dental epithelium in incisors and molars which suggests that *Kctd1* and  
539 *Yeats4* may interact directly with *Tfap2a* to modulate its expression in developing teeth, though  
540 this prediction remains to be tested. Additionally, at the early bell stage, *Yeats4* and *Tfap2b* were  
541 both expressed in incisor ameloblasts. These findings highlight regions of both co-expression  
542 and divergent expression domains of *Tfap2a* and *Tfap2b* and their regulators during development  
543 of incisors and molars.

544

### 545 **4.3 Cooperative functional roles for TFAP2A and TFAP2B in the craniodental ectoderm** 546 **during tooth formation.**

547 It has been well established that TFAP2A and TFAP2B are able to form heterodimers  
548 (Ding et al., 2009; Williams and Tjian, 1991), can bind the same DNA consensus sequences

549 (Williams and Tjian, 1991), and are capable of functioning redundantly in tissues in which they  
550 are co-expressed (Hoffman et al., 2007; Li and Cornell, 2007; Rothstein and Simoes-Costa,  
551 2020; Seberg et al., 2017; Van Otterloo et al., 2018; Wang et al., 2008). We showed that  
552 TFAP2A and TFAP2B cooperatively function within the craniodental ectoderm, including the  
553 dental epithelium, to regulate incisor development. Conditional deletion of these genes  
554 specifically within the craniodental ectoderm led to duplication or ventral curvature of lower  
555 incisors and loss or reduction of the upper incisors. It remains to be determined how epithelial  
556 AP-2 function may influence incisor development and the spatiotemporal requirements of this  
557 function.

558 Two potential explanations for the lower incisor duplication in mutants involve a role for  
559 AP-2 in dorsoventral patterning. One possibility is that early in dental development, the  
560 odontogenic region is expanded ventrally, allowing the initiation of an ectopic incisor within the  
561 non-odontogenic aboral domain of the mandible (Figure 8). Alternatively, loss of AP-2 function  
562 within the surface ectoderm could indirectly affect incisor number by shifting the dorsoventral  
563 axis identity within the mandible such that the ventral (aboral) region takes on a more dorsal-like  
564 identity, thereby permitting the formation of an ectopic tooth.

565 Given that in our ectoderm-specific line (*Crect*), *Cre*-recombinase is expressed in both  
566 epithelial (including oral and dental epithelia) and surface ectoderm tissues, it is difficult to  
567 distinguish between these models. A complete transformation of a mandibular axis would likely  
568 also affect the molars, unless the transformation was isolated to anterior/distal elements of the  
569 mandible, therefore this seems improbable in these mutants. Future studies utilizing an alternate  
570 *Cre*-recombinase line that specifically targets the dental epithelium and/or expression profiling  
571 would be needed to further distinguish between these two hypotheses.

572 Interestingly, in the E14.5 mutant embryos in which a supernumerary cap stage lower  
573 incisor was observed (*Tfap2a<sup>flox/flox</sup>; Tfap2b<sup>flox/flox</sup>; Crect*), it appeared to be connected to the  
574 ventral surface epithelium (Figure 6 C, E), as if the surface epithelium were an ectopic dental  
575 lamina. This suggests that the ectopic tooth initiated in the ventral epithelium, but examination of  
576 earlier-stage embryos (*e.g.*, ~E11.5) would be needed to test this hypothesis. Ventral curvature of  
577 I<sub>1</sub> in the mutants lacking duplicated incisors is also suggestive of dorsoventral mis-patterning,  
578 however, this may be secondary to changes in the shape of the mandible which also curves  
579 ventrally compared to the control (Figure 5 M, O) (Van Otterloo et al., unpublished

580 observations). Properly patterned molars in the mutants demonstrates that the anterior teeth  
581 (incisors) are acutely affected by the loss of expression of *Tfap2a* and *Tfap2b*.

582 Altogether, the incisor duplication or ventral curvature observed in the mutant embryos  
583 suggest that *Tfap2a* and *Tfap2b* expression in the epithelium may be important for establishing or  
584 maintaining dorsoventral polarity within the anterior aspect of the mandible. Specifically, these  
585 results imply that an additional ventral epithelial region with the capacity to fully execute the  
586 odontogenic program is established along with the dental lamina in the oral cavity and that the  
587 non-dental mesenchyme is also competent to respond to initiation cues emanating from the  
588 supernumerary dental epithelium. Lack of additional ectopic tooth germs in this region indicates  
589 that the duplicated tooth likely forms from a spatially restricted region, similar to the native  
590 dental lamina.

591 Despite robust *Tfap2a* and *Tfap2b* expression within the molar tooth germs, we did not  
592 detect major defects, aside from increased tooth length, within this tooth class following loss of  
593 *Tfap2a/Tfap2b* from either the epithelial or mesenchymal tissues. There are several potential  
594 explanations as to why the molars were largely unaffected. First, it is possible that despite  
595 prominent expression, AP-2 function is not required for molar development. Second, additional  
596 *Tfap2* family members, namely *Tfap2c*, may compensate for the loss of *Tfap2a* and *Tfap2b*.  
597 Expression of *Tfap2c* was previously identified within the oral epithelium and dental  
598 mesenchyme (Chazaud et al., 1996) and it would be interesting to test whether compound loss of  
599 *Tfap2a*, *Tfap2b*, and *Tfap2c* would perturb molar development. A third related possibility is that  
600 loss of *Tfap2a/Tfap2b* in either the epithelium or mesenchyme alone is insufficient to disrupt  
601 molar development due to compensation from expression within the alternate tissue. In this  
602 scenario, elimination of *Tfap2* from both epithelium and mesenchyme simultaneously would be  
603 required to significantly disrupt molar development. Mice that are homozygous null for *Tfap2a*,  
604 however, are so severely affected that they lack a mouth and other ventral craniofacial structures  
605 (Zhang et al., 1996), and therefore a temporally inducible deletion would likely be needed to  
606 address this.

607

608 **4.4 Phenotypic variability in incisors following loss of epithelial TFAP2A/TFAP2B function**  
609 **both within and between genetic crosses**

610 Supernumerary lower incisors are present in both *Tfap2a<sup>flox/flox</sup>;Tfap2b<sup>flox/flox</sup>;Crect*  
611 embryos (*i.e.*, *Tfap2a/Tfap2b* are “wild type” outside the *Cre*-positive domain) and  
612 *Tfap2a<sup>flox/null</sup>;Tfap2b<sup>flox/null</sup>;Crect* embryos (*i.e.*, *Tfap2a/Tfap2b* are *heterozygous* outside of the  
613 *Cre*-positive domain). In both crosses, however, we also observed embryos in which the incisor  
614 exhibited ventral curvature but was not duplicated. Variability within and between crosses was  
615 also noted for the upper incisors, which were either absent, reduced from two incisors to one, or  
616 reduced in size. Larger sample sizes would be needed to better characterize the variation in the  
617 upper incisor phenotype in these mutants.

618

#### 619 **4.5 Potential molecular mediators of dental defects in *Tfap2a/Tfap2b* ectodermal mutants.**

620 If an odontogenic region has been expanded or duplicated in *Tfap2a/Tfap2b* ectodermal  
621 mutant embryos, what molecular signals are responsible? It has been well-established in mice  
622 that the dental epithelium is patterned into two distinct regions, an anterior incisor region and a  
623 more posterior molar region, and the inductive molecular signals from each region in the  
624 epithelium elicit different molecular responses from the dental mesenchyme (Chen et al., 1996;  
625 Neubüser et al., 1997; Tucker et al., 1998b; Xu et al., 2019). The proximal-distal axis of the  
626 dentition is established by E10.5 within the presumptive dental epithelium, via expression of  
627 *Bmp4* anteriorly in the future incisor region and *Fgf8* posteriorly in the future molar region  
628 (Neubüser et al., 1997; Xu et al., 2019). In response to epithelial expression of *Bmp4*, *Msx1/2* are  
629 expressed in the underlying incisor mesenchyme (Chen et al., 1996; Tucker et al., 1998b) and  
630 epithelial expression of *Fgf8* induces *Pax9* expression in the molar mesenchyme (Neubüser et  
631 al., 1997).

632 Demarcation of the oral-aboral (dorsal-ventral) axis of the mandible also occurs early in  
633 development primarily via complementary expression of homeobox genes, including, *Gooseoid*  
634 (*Gsc*), which is limited to the non-dental mesenchyme, and *LIM homeobox 6* and *7* (*Lhx6* and *7*),  
635 which are expressed in overlapping domains throughout the presumptive dental mesenchyme  
636 (Grigoriou et al., 1998). Previous work demonstrated that at E10 the aboral (ventral)  
637 mesenchyme is competent to form teeth when cultured with exogenous *Fgf8* which induces  
638 expression of *Lhx6/7* and represses *Gsc*, but that this ability is lost by E11 when the aboral  
639 mesenchyme is no longer competent to express *Lhx6/7* (Tucker et al., 1999).

640           Given that the incisors are uniquely affected in the mutant embryos that lack *Tfap2a* and  
641 *Tfap2b* expression in the epithelium and that the duplicated incisor appears to be developing  
642 along the same timeline as I<sub>1</sub> we predict that a ventral dental lamina is patterned and that a  
643 supernumerary tooth germ is initiated at the same time as I<sub>1</sub> (E10-11) when the mesenchyme,  
644 both oral and aboral, is competent to respond to initiating cues from the dental epithelium. At  
645 E10.5, *Tfap2a* is expressed in the crest-derived mesenchyme of the first branchial arch while  
646 both *Tfap2a* and *Tfap2b* are expressed in the epithelium surrounding the first branchial arch  
647 (Zhang and Williams, 2003; Zhao et al., 2011). Our expression data show that *Tfap2a* and  
648 *Tfap2b* are also expressed in the dental and mandibular epithelia but only *Tfap2a* is expressed in  
649 the incisor mesenchyme at the early bud stage (E12.5). The transient inductive capacity of the  
650 epithelium and competence of the branchial arch mesenchyme (oral and aboral) to respond at  
651 E10-11, may explain why the loss of *Tfap2a* and *Tfap2b* expression in the epithelium has a much  
652 larger effect on early patterning of the dentition compared to the deletion of *Tfap2a* and *Tfap2b*  
653 in the neural-crest derived mesenchyme.

654           We hypothesize that expansion and/or upregulation of *Bmp4* signaling in the epithelium  
655 at the time when the oral-aboral axis of the first branchial arch is established (~E10-10.5) could  
656 result in a ventral expansion of the anterior odontogenic domain (Figure 8). Previous work  
657 showed that in *Tfap2b*-null mice, *Bmp4* is upregulated and slightly expanded in the distal limb  
658 buds at E10.5-11.5 and that *Bmp4* promoter activity is negatively regulated by both *Tfap2a* and  
659 *Tfap2b* (Zhao et al., 2011). If loss of epithelial expression of *Tfap2a* and *Tfap2b* also results in  
660 loss of negative regulation of *Bmp4* in the face as in the limbs, this could result in upregulation  
661 and/or expansion of *Bmp4* expression in the future incisor region at ~E10.5. Upregulation of  
662 *Bmp4* at E10.5 could, in turn, result in expansion/upregulation of downstream genes (e.g., *Msx1*)  
663 in the dental mesenchyme. *Msx1* normally becomes restricted to the dorsal (odontogenic)  
664 mesenchyme within the mandible by ~E11 (Tucker et al., 1998a). Importantly in this model,  
665 upregulation/expansion of *Bmp4* and, subsequently, *Msx1* expression at ~E10.5 could  
666 hypothetically lead to an additional incisor domain without affecting patterning more posteriorly  
667 in the molar region, demarcated by epithelial *Fgf8*, therefore, this could result in the phenotype  
668 observed in embryos from both crosses lacking epithelial *Tfap2a* and *Tfap2b* expression  
669 (*Tfap2a*<sup>flox/flox</sup>; *Tfap2b*<sup>flox/flox</sup>; *Crect* and *Tfap2a*<sup>flox/null</sup>; *Tfap2b*<sup>flox/null</sup>; *Crect*).

670            Additionally, *Dlx* genes are crucial for proximal-distal patterning the jaw and dentition  
671 (Depew et al., 1999; McCollum and Sharpe, 2002; Qiu et al., 1997; Zhao et al., 2000), and *Dlx2*,  
672 5, and 6 are expressed in the oral mesenchyme of the mandible (Zhao et al., 2000). Given that all  
673 six *Dlx* genes are downregulated in mice lacking mesenchymal expression of *Tfap2a* and *Tfap2b*  
674 (Van Otterloo et al., 2018), and it seems likely that expression of these genes, particularly *Dlx2*,  
675 5, and 6, may also be affected in the *Tfap2a* and *Tfap2b* ectoderm-specific (*Crect*) mutants.

676 **Acknowledgements**

677 We thank Dr. Brooke Armfield for her assistance with experimental design, mouse breeding, and  
678 for teaching EDW to perform various assays, including *in situ* hybridization. We thank Dr.  
679 Christine Larkins and Dr. Kelsey Lewis for assistance and advice with the neural crest lineage  
680 tracing experiment, Alyssa Mangino for assistance with sectioning and *in situ* hybridization,  
681 Blake Hauer for assistance with sectioning, and Emily Merton for technical support. We also  
682 acknowledge Dr. Gary Scheiffle and Dr. Edward Stanley at the University of Florida Nanoscale  
683 Research Facility for their assistance with  $\mu$ CT scanning. Finally, we thank all members of the  
684 Cohn laboratory for valuable insights and critical discussion of this work.

685

686 **Funding**

687 This work was supported by an NSF DDRI 1455572 to EDW and MJC, an American Society of  
688 Mammalogists grant to EDW, an NIDCR K99/R00 DE026823 to EVO, and NIH 2R01 DE12728  
689 to TW.

690

691 **Data Availability**

692 The  $\mu$ CT data from this study will be freely available to the public on FaceBase3  
693 (<https://www.facebase.org/>).



694 **References**

- 695 Acloque, H., Wilkinson, D.G., Nieto, M.A., 2008. In situ hybridization analysis of chick  
696 embryos in whole-mount and tissue sections. *Methods Cell Biol.* 87, 169–185.  
697 [https://doi.org/10.1016/S0091-679X\(08\)00209-4](https://doi.org/10.1016/S0091-679X(08)00209-4)
- 698 Ahn, Y., Sanderson, B.W., Klein, O.D., Krumlauf, R., 2010. Inhibition of Wnt signaling by Wise  
699 (*Sostdc1*) and negative feedback from Shh controls tooth number and patterning.  
700 *Development* dev.054668. <https://doi.org/10.1242/dev.054668>
- 701 Alappat, S., Zhang, Z.Y., Chen, Y.P., 2003. Msx homeobox gene family and craniofacial  
702 development. *Cell Res.* 13, 429–442. <https://doi.org/10.1038/sj.cr.7290185>
- 703 Anderson, R.M., Stottmann, R.W., Choi, M., Klingensmith, J., 2006. Endogenous bone  
704 morphogenetic protein antagonists regulate mammalian neural crest generation and  
705 survival. *Developmental Dynamics* 235, 2507–2520. <https://doi.org/10.1002/dvdy.20891>
- 706 Barembaum, M., Bronner, M.E., 2013. Identification and dissection of a key enhancer mediating  
707 cranial neural crest specific expression of transcription factor, *Ets-1*. *Dev. Biol.* 382, 567–  
708 575. <https://doi.org/10.1016/j.ydbio.2013.08.009>
- 709 Braissant, O., Wahli, W., 1998. A Simplified In Situ Hybridization Protocol Using Non-  
710 radioactively Labeled Probes to Detect Abundant and Rare mRNAs on Tissue Sections.  
711 *Biochemica* 1.
- 712 Brewer, S., Feng, W., Huang, J., Sullivan, S., Williams, T., 2004. Wnt1-Cre-mediated deletion of  
713 AP-2 $\alpha$  causes multiple neural crest-related defects. *Dev. Biol.* 267, 135–152.  
714 <https://doi.org/10.1016/j.ydbio.2003.10.039>
- 715 Brewer, S., Williams, T., 2004. Loss of AP-2 $\alpha$  impacts multiple aspects of ventral body wall  
716 development and closure. *Developmental Biology* 267, 399–417.  
717 <https://doi.org/10.1016/j.ydbio.2003.11.021>
- 718 Britsch, S., Goerich, D.E., Riethmacher, D., Peirano, R.I., Rossner, M., Nave, K.-A., Birchmeier,  
719 C., Wegner, M., 2001. The transcription factor Sox10 is a key regulator of peripheral  
720 glial development. *Genes Dev* 15, 66–78. <https://doi.org/10.1101/gad.186601>
- 721 Chai, Y., Jiang, X., Ito, Y., Bringas, P., Han, J., Rowitch, D.H., Soriano, P., McMahon, A.P.,  
722 Sucov, H.M., 2000. Fate of the mammalian cranial neural crest during tooth and  
723 mandibular morphogenesis. *Development* 127, 1671–1679.
- 724 Chazaud, C., Oulad-Abdelghani, M., Bouillet, P., Décimo, D., Chambon, P., Dollé, P., 1996. AP-  
725 2.2, a novel gene related to AP-2, is expressed in the forebrain, limbs and face during  
726 mouse embryogenesis. *Mechanisms of Development* 54, 83–94.  
727 [https://doi.org/10.1016/0925-4773\(95\)00463-7](https://doi.org/10.1016/0925-4773(95)00463-7)
- 728 Chen, Y., Bei, M., Woo, I., Satokata, I., Maas, R., 1996. Msx1 controls inductive signaling in  
729 mammalian tooth morphogenesis. *Development* 122, 3035.
- 730 Cho, S.-W., Lee, H.-A., Cai, J., Lee, M.-J., Kim, J.-Y., Ohshima, H., Jung, H.-S., 2007. The  
731 primary enamel knot determines the position of the first buccal cusp in developing mice  
732 molars. *Differentiation* 75, 441–451. <https://doi.org/10.1111/j.1432-0436.2006.00153.x>
- 733 Csanady, A., Mosansky, L., 2018. Skull morphometry and sexual size dimorphism in *Mus*  
734 *musculus* from Slovakia. *North-Western Journal of Zoology* 14, 102–106.
- 735 Danielian, P.S., Muccino, D., Rowitch, D.H., Michael, S.K., McMahon, A.P., 1998.  
736 Modification of gene activity in mouse embryos in utero by a tamoxifen-inducible form  
737 of Cre recombinase. *Current Biology* 8, 1323-S2. [https://doi.org/10.1016/S0960-9822\(07\)00562-3](https://doi.org/10.1016/S0960-9822(07)00562-3)  
738

- 739 de Croze, N., Maczkowiak, F., Monsoro-Burq, A.H., 2011. Reiterative AP2a activity controls  
740 sequential steps in the neural crest gene regulatory network. *Proceedings of the National*  
741 *Academy of Sciences* 108, 155–160. <https://doi.org/10.1073/pnas.1010740107>
- 742 Depew, M.J., Liu, J.K., Long, J.E., Presley, R., Meneses, J.J., Pedersen, R.A., Rubenstein, J.L.,  
743 1999. Dlx5 regulates regional development of the branchial arches and sensory capsules.  
744 *Development* 126, 3831–3846.
- 745 Ding, X., Fan, C., Zhou, J., Zhong, Y., Liu, R., Ren, K., Hu, X., Luo, C., Xiao, S., Wang, Y.,  
746 Feng, D., Zhang, J., 2006. GAS41 interacts with transcription factor AP-2beta and  
747 stimulates AP-2beta-mediated transactivation. *Nucleic Acids Res.* 34, 2570–2578.  
748 <https://doi.org/10.1093/nar/gkl319>
- 749 Ding, X., Luo, C., Zhou, J., Zhong, Y., Hu, X., Zhou, F., Ren, K., Gan, L., He, A., Zhu, J., Gao,  
750 X., Zhang, J., 2009. The interaction of KCTD1 with transcription factor AP-2 $\alpha$  inhibits  
751 its transactivation. *Journal of Cellular Biochemistry* 106, 285–295.  
752 <https://doi.org/10.1002/jcb.22002>
- 753 Douarin, N.L., Kalcheim, C., 1999. *The Neural Crest*, 2nd ed. Cambridge University Press.  
754 <https://doi.org/10.1017/CBO9780511897948>
- 755 Dressler, S., Meyer-Marcotty, P., Weisschuh, N., Jablonski-Momeni, A., Pieper, K., Gramer, G.,  
756 Gramer, E., 2010. Dental and Craniofacial Anomalies Associated with Axenfeld-Rieger  
757 Syndrome with PITX2 Mutation. *Case Rep Med* 2010.  
758 <https://doi.org/10.1155/2010/621984>
- 759 Eckert, D., Buhl, S., Weber, S., Jäger, R., Schorle, H., 2005. The AP-2 family of transcription  
760 factors. *Genome Biol* 6, 246. <https://doi.org/10.1186/gb-2005-6-13-246>
- 761 Grigoriou, M., Tucker, A.S., Sharpe, P.T., Pachnis, V., 1998. Expression and regulation of Lhx6  
762 and Lhx7, a novel subfamily of LIM homeodomain encoding genes, suggests a role in  
763 mammalian head development. *Development* 125, 2063–2074.
- 764 Hall, B.K., 2009. *The Neural Crest and Neural Crest Cells in Vertebrate Development and*  
765 *Evolution*, 2nd ed. Springer US.
- 766 Harada, H., Toyono, T., Toyoshima, K., Yamasaki, M., Itoh, N., Kato, S., Sekine, K., Ohuchi,  
767 H., 2002. FGF10 maintains stem cell compartment in developing mouse incisors.  
768 *Development* 129, 1533–1541.
- 769 Harjunmaa, E., Kallonen, A., Voutilainen, M., Hämäläinen, K., Mikkola, M.L., Jernvall, J.,  
770 2012. On the difficulty of increasing dental complexity. *Nature* 483, 324–327.  
771 <https://doi.org/10.1038/nature10876>
- 772 Hoffman, T.L., Javier, A.L., Campeau, S.A., Knight, R.D., Schilling, T.F., 2007. Tfap2  
773 transcription factors in zebrafish neural crest development and ectodermal evolution.  
774 *Journal of Experimental Zoology Part B: Molecular and Developmental Evolution* 308B,  
775 679–691. <https://doi.org/10.1002/jez.b.21189>
- 776 Hu, X., Zhang, S., Chen, G., Lin, C., Huang, Z., Chen, Y., Zhang, Y., 2013. Expression of SHH  
777 signaling molecules in the developing human primary dentition. *BMC Dev. Biol.* 13, 11.  
778 <https://doi.org/10.1186/1471-213X-13-11>
- 779 Huang, Z., Hu, X., Lin, C., Chen, S., Huang, F., Zhang, Y., 2014. Genome-wide analysis of gene  
780 expression in human embryonic tooth germ. *J. Mol. Histol.* 45, 609–617.  
781 <https://doi.org/10.1007/s10735-014-9580-5>
- 782 Imai, H., Osumi-Yamashita, N., Ninomiya, Y., Eto, K., 1996. Contribution of early-emigrating  
783 midbrain crest cells to the dental mesenchyme of mandibular molar teeth in rat embryos.  
784 *Dev. Biol.* 176, 151–165. <https://doi.org/10.1006/dbio.1996.9985>

- 785 Jacques-Fricke, B.T., Roffers-Agarwal, J., Gammill, L.S., 2012. DNA methyltransferase 3b is  
786 dispensable for mouse neural crest development. *PLoS ONE* 7, e47794.  
787 <https://doi.org/10.1371/journal.pone.0047794>
- 788 Jernvall, J., Kettunen, P., Karavanova, I., Martin, L.B., Thesleff, I., 1994. Evidence for the role  
789 of the enamel knot as a control center in mammalian tooth cusp formation: non-dividing  
790 cells express growth stimulating Fgf-4 gene. *Int. J. Dev. Biol.* 38, 463–469.
- 791 Jernvall, J., Thesleff, I., 2012. Tooth shape formation and tooth renewal: evolving with the same  
792 signals. *Development* 139, 3487–3497. <https://doi.org/10.1242/dev.085084>
- 793 Jiang, X., Iseki, S., Maxson, R.E., Sucov, H.M., Morriss-Kay, G.M., 2002. Tissue Origins and  
794 Interactions in the Mammalian Skull Vault. *Developmental Biology* 241, 106–116.  
795 <https://doi.org/10.1006/dbio.2001.0487>
- 796 Kaufman, M.H., 1992. *The Atlas of Mouse Development*. Elsevier Science.
- 797 Klein, O.D., Lyons, D.B., Balooch, G., Marshall, G.W., Basson, M.A., Peterka, M., Boran, T.,  
798 Peterkova, R., Martin, G.R., 2008. An FGF signaling loop sustains the generation of  
799 differentiated progeny from stem cells in mouse incisors. *Development* 135, 377–385.  
800 <https://doi.org/10.1242/dev.015081>
- 801 Knight, R.D., Javidan, Y., Zhang, T., Nelson, S., Schilling, T.F., 2005. AP2-dependent signals  
802 from the ectoderm regulate craniofacial development in the zebrafish embryo.  
803 *Development* 132, 3127–3138. <https://doi.org/10.1242/dev.01879>
- 804 Kollar, E.J., Baird, G.R., 1969. The influence of the dental papilla on the development of tooth  
805 shape in embryonic mouse tooth germs. *Development* 21, 131–148.
- 806 Laugel-Haushalter, V., Paschaki, M., Thibault-Carpentier, C., Dembelé, D., Dollé, P., Bloch-  
807 Zupan, A., 2013. Molars and incisors: show your microarray IDs. *BMC Res Notes* 6,  
808 113. <https://doi.org/10.1186/1756-0500-6-113>
- 809 Li, W., Cornell, R.A., 2007. Redundant activities of Tfap2a and Tfap2c are required for neural  
810 crest induction and development of other non-neural ectoderm derivatives in zebrafish  
811 embryos. *Developmental Biology* 304, 338–354.  
812 <https://doi.org/10.1016/j.ydbio.2006.12.042>
- 813 Lumsden, A.G., 1988. Spatial organization of the epithelium and the role of neural crest cells in  
814 the initiation of the mammalian tooth germ. *Development* 103 Suppl, 155–169.
- 815 Lumsden, A.G.S., 1987. The neural crest contribution to tooth development in the mammalian  
816 embryo, in: *Developmental and Evolutionary Aspects of the Neural Crest*. Wiley, New  
817 York, pp. 261–300.
- 818 Lumsden, A.G.S., Buchanan, J.A.G., 1986. An experimental study of timing and topography of  
819 early tooth development in the mouse embryo with an analysis of the role of innervation.  
820 *Archives of Oral Biology* 31, 301–311. [https://doi.org/10.1016/0003-9969\(86\)90044-0](https://doi.org/10.1016/0003-9969(86)90044-0)
- 821 Luukko, K., Løes, S., Furmanek, T., Fjeld, K., Kvinnsland, I.H., Kettunen, P., 2003.  
822 Identification of a novel putative signaling center, the tertiary enamel knot in the  
823 postnatal mouse molar tooth. *Mech. Dev.* 120, 270–276.
- 824 Martin, P., 2002. Tissue patterning in the developing mouse limb. *Int. J. Dev. Biol.* 34, 323–336.  
825 <https://doi.org/10.1387/ijdb.1702679>
- 826 Martino, V.B., Sabljic, T., Deschamps, P., Green, R.M., Akula, M., Peacock, E., Ball, A.,  
827 Williams, T., West-Mays, J.A., 2016. Conditional deletion of AP-2 $\beta$  in mouse cranial  
828 neural crest results in anterior segment dysgenesis and early-onset glaucoma. *Disease*  
829 *Models & Mechanisms* 9, 849–861. <https://doi.org/10.1242/dmm.025262>

- 830 Matalova, E., Antonarakis, G.S., Sharpe, P.T., Tucker, A.S., 2005. Cell lineage of primary and  
831 secondary enamel knots. *Dev. Dyn.* 233, 754–759. <https://doi.org/10.1002/dvdy.20396>
- 832 McCollum, M.A., Sharpe, P.T., 2002. Developmental genetics and early hominid craniodental  
833 evolution. *BioEssays* 23, 481–493. <https://doi.org/10.1002/bies.1068>
- 834 McKenzie, I.A., Ohayon, D., Li, H., de Faria, J.P., Emery, B., Tohyama, K., Richardson, W.D.,  
835 2014. Motor skill learning requires active central myelination. *Science* 346, 318–322.  
836 <https://doi.org/10.1126/science.1254960>
- 837 Metscher, B.D., 2009. MicroCT for developmental biology: a versatile tool for high-contrast 3D  
838 imaging at histological resolutions. *Dev. Dyn.* 238, 632–640.  
839 <https://doi.org/10.1002/dvdy.21857>
- 840 Milunsky, J.M., Maher, T.A., Zhao, G., Roberts, A.E., Stalker, H.J., Zori, R.T., Burch, M.N.,  
841 Clemens, M., Mulliken, J.B., Smith, R., Lin, A.E., 2008. TFAP2A Mutations Result in  
842 Branchio-Oculo-Facial Syndrome. *The American Journal of Human Genetics* 82, 1171–  
843 1177. <https://doi.org/10.1016/j.ajhg.2008.03.005>
- 844 Mina, M., Kollar, E.J., 1987. The induction of odontogenesis in non-dental mesenchyme  
845 combined with early murine mandibular arch epithelium. *Arch. Oral Biol.* 32, 123–127.
- 846 Mitchell, P.J., Timmons, P.M., Hebert, J.M., Rigby, P.W., Tjian, R., 1991. Transcription factor  
847 AP-2 is expressed in neural crest cell lineages during mouse embryogenesis. *Genes &*  
848 *Development* 5, 105–119. <https://doi.org/10.1101/gad.5.1.105>
- 849 Moser, M., Rüschoff, J., Buettner, R., 1997. Comparative analysis of AP-2 alpha and AP-2 beta  
850 gene expression during murine embryogenesis. *Dev. Dyn.* 208, 115–124.  
851 [https://doi.org/10.1002/\(SICI\)1097-0177\(199701\)208:1<115::AID-AJA11>3.0.CO;2-5](https://doi.org/10.1002/(SICI)1097-0177(199701)208:1<115::AID-AJA11>3.0.CO;2-5)
- 852 Mostowska, A., Kobiela, A., Trzeciak, W.H., 2003. Molecular basis of non-syndromic tooth  
853 agenesis: mutations of MSX1 and PAX9 reflect their role in patterning human dentition.  
854 *European Journal of Oral Sciences* 111, 365–370. <https://doi.org/10.1034/j.1600-0722.2003.00069.x>
- 855
- 856 Muzumdar, M.D., Tasic, B., Miyamichi, K., Li, L., Luo, L., 2007. A global double-fluorescent  
857 Cre reporter mouse. *Genesis* 45, 593–605. <https://doi.org/10.1002/dvg.20335>
- 858 Neubüser, A., Peters, H., Balling, R., Martin, G.R., 1997. Antagonistic Interactions between FGF  
859 and BMP Signaling Pathways: A Mechanism for Positioning the Sites of Tooth  
860 Formation. *Cell* 90, 247–255. [https://doi.org/10.1016/S0092-8674\(00\)80333-5](https://doi.org/10.1016/S0092-8674(00)80333-5)
- 861 Nichols, D.H., 1986. Formation and distribution of neural crest mesenchyme to the first  
862 pharyngeal arch region of the mouse embryo. *Am. J. Anat.* 176, 221–231.  
863 <https://doi.org/10.1002/aja.1001760210>
- 864 Nichols, D.H., 1981. Neural crest formation in the head of the mouse embryo as observed using  
865 a new histological technique. *Development* 64, 105–120.
- 866 Nottoli, T., Hagopian-Donaldson, S., Zhang, J., Perkins, A., Williams, T., 1998. AP-2-null cells  
867 disrupt morphogenesis of the eye, face, and limbs in chimeric mice. *PNAS* 95, 13714–  
868 13719. <https://doi.org/10.1073/pnas.95.23.13714>
- 869 Ota, M.S., Loebel, D.A.F., O'Rourke, M.P., Wong, N., Tsoi, B., Tam, P.P.L., 2004. Twist is  
870 required for patterning the cranial nerves and maintaining the viability of mesodermal  
871 cells. *Developmental Dynamics* 230, 216–228. <https://doi.org/10.1002/dvdy.20047>
- 872 Peters, H., Neubüser, A., Kratochwil, K., Balling, R., 1998. Pax9-deficient mice lack pharyngeal  
873 pouch derivatives and teeth and exhibit craniofacial and limb abnormalities. *Genes Dev*  
874 12, 2735–2747.

- 875 Pispá, J., Jung, H.S., Jernvall, J., Kettunen, P., Mustonen, T., Tabata, M.J., Kere, J., Thesleff, I.,  
876 1999. Cusp patterning defect in Tabby mouse teeth and its partial rescue by FGF. *Dev.*  
877 *Biol.* 216, 521–534. <https://doi.org/10.1006/dbio.1999.9514>
- 878 Qiu, M., Bulfone, A., Ghattas, I., Meneses, J.J., Christensen, L., Sharpe, P.T., Presley, R.,  
879 Pedersen, R.A., Rubenstein, J.L.R., 1997. Role of the Dlx Homeobox Genes in  
880 Proximodistal Patterning of the Branchial Arches: Mutations of Dlx-1, Dlx-2, and Dlx-1  
881 and -2 Alter Morphogenesis of Proximal Skeletal and Soft Tissue Structures Derived  
882 from the First and Second Arches. *Developmental Biology* 185, 165–184.  
883 <https://doi.org/10.1006/dbio.1997.8556>
- 884 Rothová, M., Feng, J., Sharpe, P.T., Peterková, R., Tucker, A.S., 2011. Contribution of  
885 mesoderm to the developing dental papilla. *Int. J. Dev. Biol.* 55, 59–64.  
886 <https://doi.org/10.1387/ijdb.103083mr>
- 887 Rothstein, M., Simoes-Costa, M., 2020. Heterodimerization of TFAP2 pioneer factors drives  
888 epigenomic remodeling during neural crest specification. *Genome Res.* 30, 35–48.  
889 <https://doi.org/10.1101/gr.249680.119>
- 890 Satoda, M., Zhao, F., Diaz, G.A., Burn, J., Goodship, J., Davidson, H.R., Pierpont, M.E.M.,  
891 Gelb, B.D., 2000. Mutations in TFAP2B cause Char syndrome, a familial form of patent  
892 ductus arteriosus. *Nature Genetics* 25, 42–46. <https://doi.org/10.1038/75578>
- 893 Satokata, I., Maas, R., 1994. Msx1 deficient mice exhibit cleft palate and abnormalities of  
894 craniofacial and tooth development. *Nat. Genet.* 6, 348–356.  
895 <https://doi.org/10.1038/ng0494-348>
- 896 Sauka-Spengler, T., Bronner-Fraser, M., 2008. A gene regulatory network orchestrates neural  
897 crest formation. *Nat. Rev. Mol. Cell Biol.* 9, 557–568. <https://doi.org/10.1038/nrm2428>
- 898 Schock, E.N., Struve, J.N., Chang, C.-F., Williams, T.J., Snedeker, J., Attia, A.C., Stottmann,  
899 R.W., Brugmann, S.A., 2017. A tissue-specific role for intraflagellar transport genes  
900 during craniofacial development. *PLOS ONE* 12, e0174206.  
901 <https://doi.org/10.1371/journal.pone.0174206>
- 902 Seberg, H.E., Van Otterloo, E., Loftus, S.K., Liu, H., Bonde, G., Sompallae, R., Gildea, D.E.,  
903 Santana, J.F., Manak, J.R., Pavan, W.J., Williams, T., Cornell, R.A., 2017. TFAP2  
904 paralogs regulate melanocyte differentiation in parallel with MITF. *PLOS Genetics* 13,  
905 e1006636. <https://doi.org/10.1371/journal.pgen.1006636>
- 906 Simões-Costa, M., Bronner, M.E., 2015. Establishing neural crest identity: a gene regulatory  
907 recipe. *Development* 142, 242–257. <https://doi.org/10.1242/dev.105445>
- 908 Soo, K., O'Rourke, M.P., Khoo, P.-L., Steiner, K.A., Wong, N., Behringer, R.R., Tam, P.P.L.,  
909 2002. Twist Function Is Required for the Morphogenesis of the Cephalic Neural Tube  
910 and the Differentiation of the Cranial Neural Crest Cells in the Mouse Embryo.  
911 *Developmental Biology* 247, 251–270. <https://doi.org/10.1006/dbio.2002.0699>
- 912 Tanasubsinn, N., Sittiwangkul, R., Pongprot, Y., Kawasaki, K., Ohazama, A., Sastraruji, T.,  
913 Kaewgahya, M., Kantaputra, P.N., 2017. TFAP2B mutation and dental anomalies. *J Hum*  
914 *Genet* 62, 769–775. <https://doi.org/10.1038/jhg.2017.37>
- 915 Thesleff, I., Keränen, S., Jernvall, J., 2001. Enamel knots as signaling centers linking tooth  
916 morphogenesis and odontoblast differentiation. *Adv. Dent. Res.* 15, 14–18.  
917 <https://doi.org/10.1177/08959374010150010401>
- 918 Theveneau, E., Mayor, R., 2012. Neural crest delamination and migration: from epithelium-to-  
919 mesenchyme transition to collective cell migration. *Dev. Biol.* 366, 34–54.  
920 <https://doi.org/10.1016/j.ydbio.2011.12.041>

- 921 Tucker, A., Sharpe, P., 2004. The cutting-edge of mammalian development; how the embryo  
922 makes teeth. *Nat. Rev. Genet.* 5, 499–508. <https://doi.org/10.1038/nrg1380>
- 923 Tucker, A.S., Khamis, A.A., Sharpe, P.T., 1998a. Interactions between Bmp-4 and Msx-1 act to  
924 restrict gene expression to odontogenic mesenchyme. *Developmental Dynamics* 212,  
925 533–539. [https://doi.org/10.1002/\(SICI\)1097-0177\(199808\)212:4<533::AID-  
926 AJA6>3.0.CO;2-I](https://doi.org/10.1002/(SICI)1097-0177(199808)212:4<533::AID-AJA6>3.0.CO;2-I)
- 927 Tucker, A.S., Matthews, K.L., Sharpe, P.T., 1998b. Transformation of Tooth Type Induced by  
928 Inhibition of BMP Signaling. *Science* 282, 1136–1138.  
929 <https://doi.org/10.1126/science.282.5391.1136>
- 930 Tucker, A.S., Yamada, G., Grigoriou, M., Pachnis, V., Sharpe, P.T., 1999. Fgf-8 determines  
931 rostral-caudal polarity in the first branchial arch. *Development* 126, 51–61.
- 932 Tummers, M., Thesleff, I., 2003. Root or crown: a developmental choice orchestrated by the  
933 differential regulation of the epithelial stem cell niche in the tooth of two rodent species.  
934 *Development* 130, 1049–1057. <https://doi.org/10.1242/dev.00332>
- 935 Uchibe, K., Shimizu, H., Yokoyama, S., Kuboki, T., Asahara, H., 2012. Identification of novel  
936 transcription-regulating genes expressed during murine molar development.  
937 *Developmental Dynamics* 241, 1217–1226. <https://doi.org/10.1002/dvdy.23808>
- 938 Vaahtokari, A., Aberg, T., Jernvall, J., Keränen, S., Thesleff, I., 1996. The enamel knot as a  
939 signaling center in the developing mouse tooth. *Mechanisms of Development* 5.
- 940 Van Otterloo, E., Li, H., Jones, K.L., Williams, T., 2018. AP-2 $\alpha$  and AP-2 $\beta$  cooperatively  
941 orchestrate homeobox gene expression during branchial arch patterning. *Development*  
942 145, dev157438. <https://doi.org/10.1242/dev.157438>
- 943 Wallace, J.T., 1968. Analysis of Dental Variation in Wild-caught California House Mice. *The*  
944 *American Midland Naturalist* 80, 360–380. <https://doi.org/10.2307/2423531>
- 945 Wang, X., Pasolli, H.A., Williams, T., Fuchs, E., 2008. AP-2 factors act in concert with Notch to  
946 orchestrate terminal differentiation in skin epidermis. *J Cell Biol* 183, 37–48.  
947 <https://doi.org/10.1083/jcb.200804030>
- 948 Williams, T., Tjian, R., 1991. Analysis of the DNA-binding and activation properties of the  
949 human transcription factor AP-2. *Genes & Development* 5, 670–682.  
950 <https://doi.org/10.1101/gad.5.4.670>
- 951 Williamson, J.A., Bosher, J.M., Skinner, A., Sheer, D., Williams, T., Hurst, H.C., 1996.  
952 Chromosomal mapping of the human and mouse homologues of two new members of the  
953 AP-2 family of transcription factors. *Genomics* 35, 262–264.  
954 <https://doi.org/10.1006/geno.1996.0351>
- 955 Xu, J., Liu, H., Lan, Y., Adam, M., Clouthier, D.E., Potter, S., Jiang, R., 2019. Hedgehog  
956 signaling patterns the oral-aboral axis of the mandibular arch. *eLife* 8, e40315.  
957 <https://doi.org/10.7554/eLife.40315>
- 958 Zhang, J., Hagopian-Donaldson, S., Serbedzija, G., Elsemore, J., Plehn-Dujowich, D.,  
959 McMahon, A.P., Flavell, R.A., Williams, T., 1996. Neural tube, skeletal and body wall  
960 defects in mice lacking transcription factor AP-2. *Nature* 381, 238–241.  
961 <https://doi.org/10.1038/381238a0>
- 962 Zhang, J., Williams, T., 2003. Identification and regulation of tissue-specific cis-acting elements  
963 associated with the human AP-2 $\alpha$  gene. *Dev. Dyn.* 228, 194–207.  
964 <https://doi.org/10.1002/dvdy.10365>
- 965 Zhao, F., Bosserhoff, A.-K., Buettner, R., Moser, M., 2011. A Heart-Hand Syndrome Gene:  
966 Tfp2b Plays a Critical Role in the Development and Remodeling of Mouse Ductus

967 Arteriosus and Limb Patterning. PLOS ONE 6, e22908.  
968 <https://doi.org/10.1371/journal.pone.0022908>  
969 Zhao, Z., Stock, D.W., Buchanan, A.V., Weiss, K.M., 2000. Expression of Dlx genes during the  
970 development of the murine dentition. *Development, Genes and Evolution* 210, 270.  
971 <https://doi.org/10.1007/s004270050314>  
972

973 **Figures**  
974

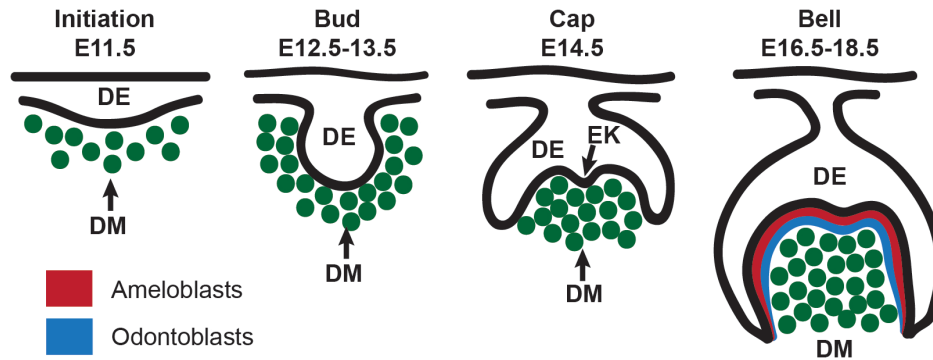

975 **Figure 1. Stages of mouse tooth development illustrating epithelial and mesenchymal tissues in a lower molar**  
976 **tooth germ at the initiation, bud, cap, and bell stages.** Once tooth development is initiated, the dental epithelium  
977 grows into the adjacent dental mesenchyme which condenses around the epithelial bud. During the cap stage the  
978 epithelium then grows around the condensed mesenchyme and the primary enamel knot forms which initiates the  
979 patterning of the tooth cusp(s). Cytodifferentiation takes place during the bell stage when the ameloblasts and  
980 odontoblasts form which will deposit enamel and dentine, respectively. DE: dental epithelium, DM: dental  
981 mesenchyme, EK: enamel knot. Drawing after Tucker and Sharpe, 2004.  
982



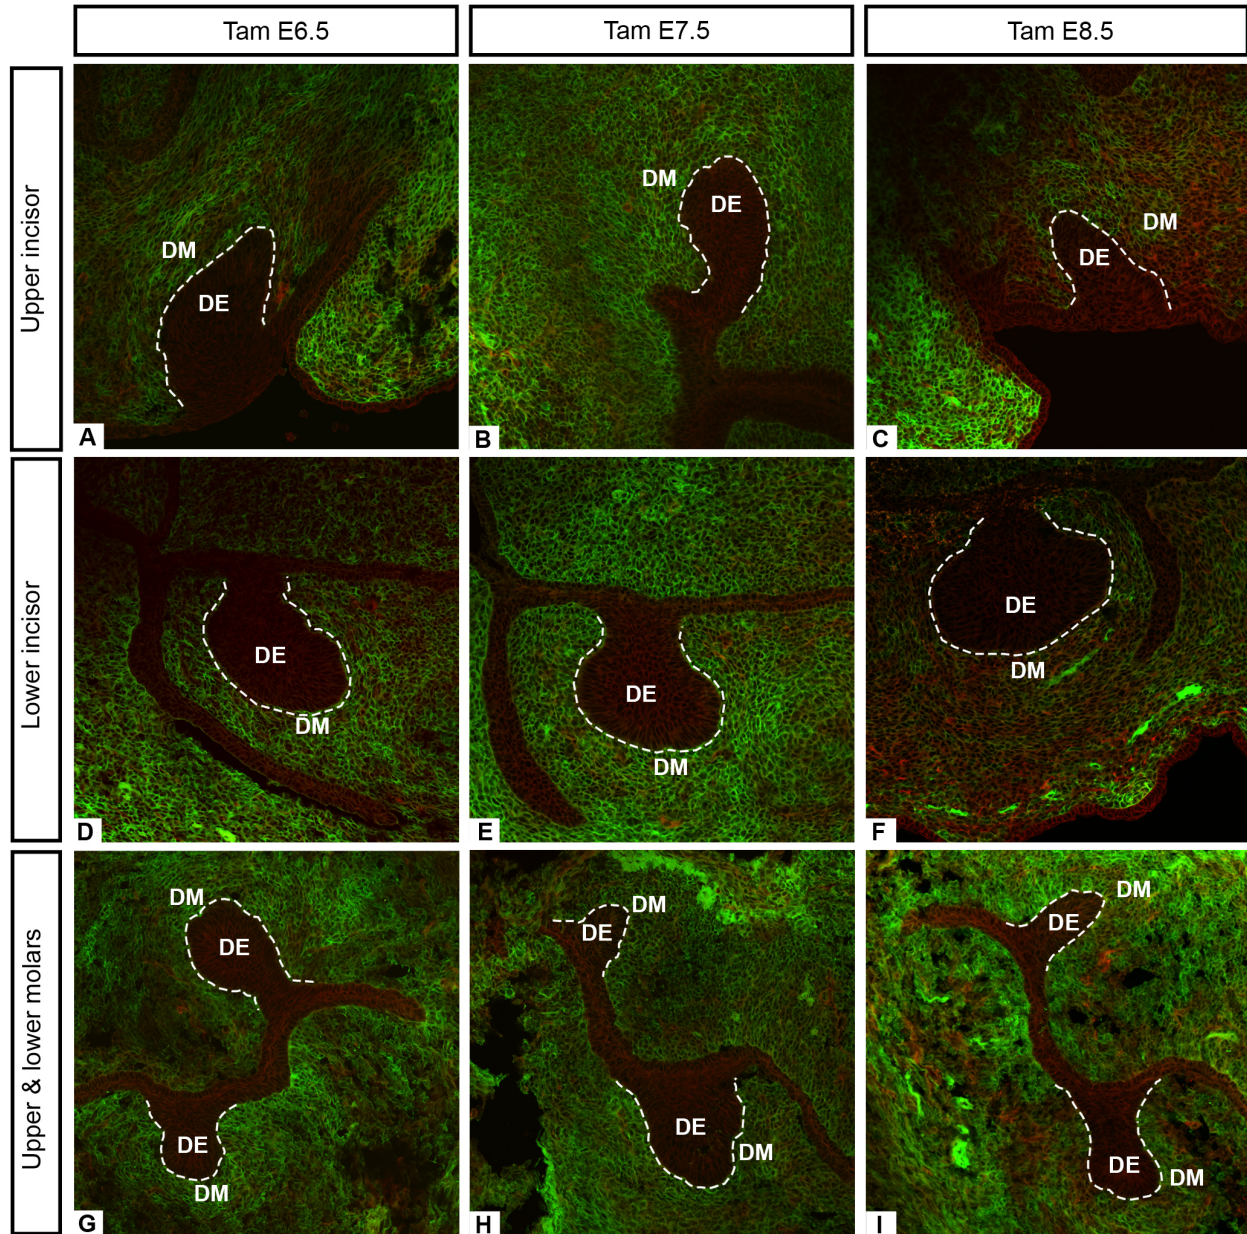

983  
984 **Figure 2. CNCC-derived mesenchyme cells (EGFP-positive) labeled via tamoxifen administration at E6.5 (A,**  
985 **D, G), E7.5 (B, E, H), or E8.5 (C, F, I) in *Sox10-iCre/ER<sup>T2</sup>;R26R<sup>mTmG/+</sup>* or *Sox10-iCre/ER<sup>T2</sup>;R26R<sup>mTmG/mTmG</sup>***  
986 **embryos. Examination of bud stage tooth germs (E13.5) revealed that fewer CNCC-derived mesenchyme cells were**  
987 **present in the incisor mesenchyme at E8.5 (C, F) compared to the molar mesenchyme (I) seen here in representative**  
988 **frontal cryosections. The dental epithelium is outlined in white. Images taken at 20X. DE: dental epithelium, DM:**  
989 **dental mesenchyme.**

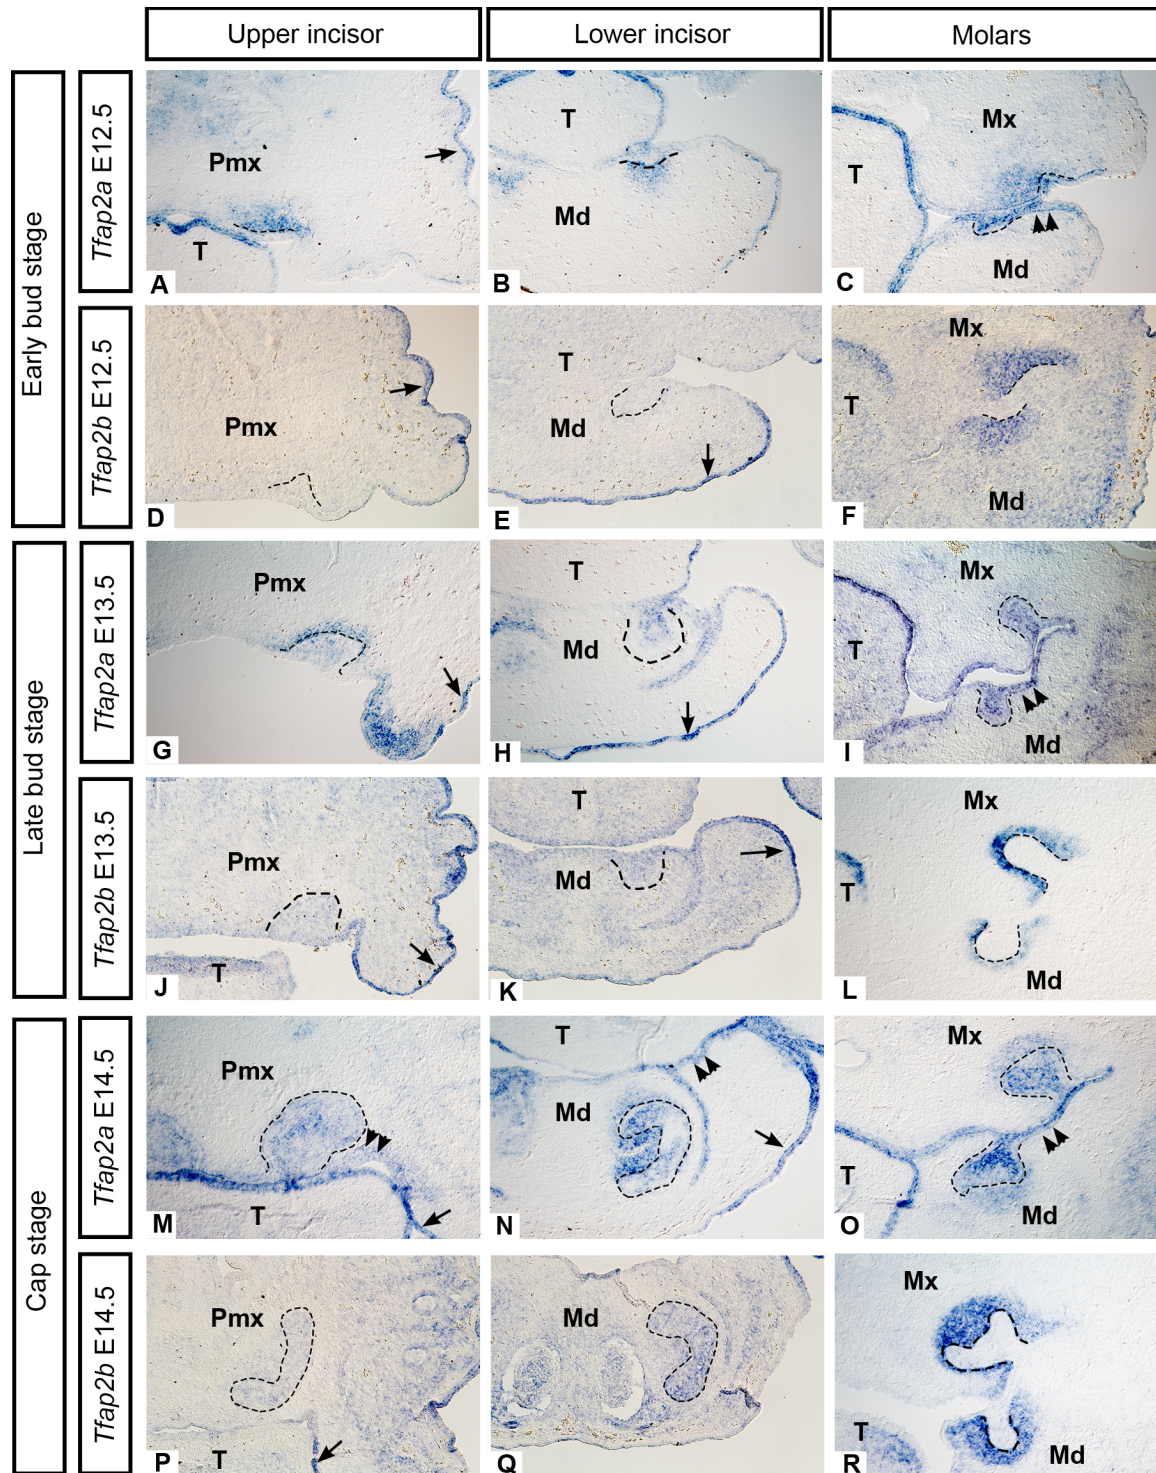

990  
 991 **Figure 3. Bud stage (E12.5 and 13.5) and cap stage (E14.5) mRNA expression of *Tfap2a* and *Tfap2b*.** mRNA  
 992 transcripts detected by *in-situ* hybridization on frontal cryosections through the upper incisor (left column), lower  
 993 incisor (middle column), and molars (right column) are shown and the dental epithelium is outlined. There is  
 994 minimal expression of *Tfap2b* in the bud stage upper and lower incisors (D-E, J-K) compared to the molar buds (F,  
 995 L). Both *Tfap2a* and *Tfap2b* were detected in the surface epithelium (arrows) but only *Tfap2a* was present in the oral  
 996 epithelium (double arrowheads). Note that only the right or left side of each frontal section is shown. Images taken  
 997 of the embryos' right side (B, C, H, I, J, K, P, Q) have been mirrored to match images taken of the left side. All  
 998 images taken at 10X magnification. Pmx: premaxilla, Mx: maxilla, Md: mandible, T: tongue.

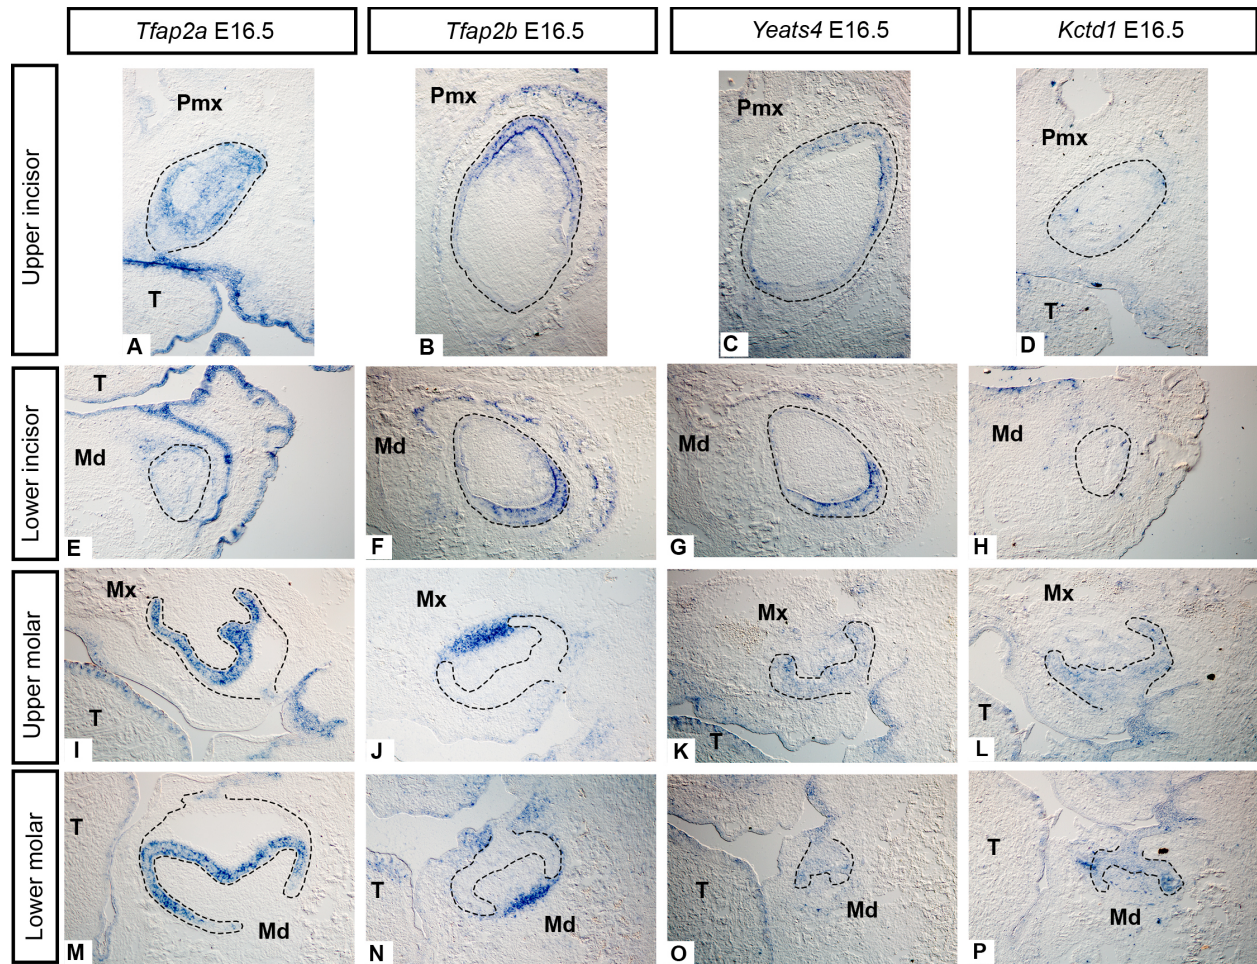

999  
1000  
1001  
1002  
1003  
1004  
1005  
1006  
1007

**Figure 4. Early bell stage (E16.5) mRNA expression of *Tfap2a*, *Tfap2b*, *Yeats4*, and *Kctd1*.** mRNA transcripts detected by *in-situ* hybridization on cryosections in the frontal plane are shown in the upper incisor (A-D), lower incisor (E-H), upper molar (I-L), and lower molar (M-P). The dental epithelium is outlined. Note in particular the highly restricted epithelial expression domain of *Tfap2a* in the molars (I, M) and the overlapping expression domains of *Tfap2b* and *Yeats4* in similar regions within the upper (B, C) and lower incisors (F, G). Note that only the right or left side of each frontal section is shown. Images taken of the embryos' right side (C, F, G, I, M, N, J, K, O) have been mirrored to match images taken of the left side. All images taken at 10X magnification. Pmx: premaxilla, Mx: maxilla, Md: mandible, T: tongue.

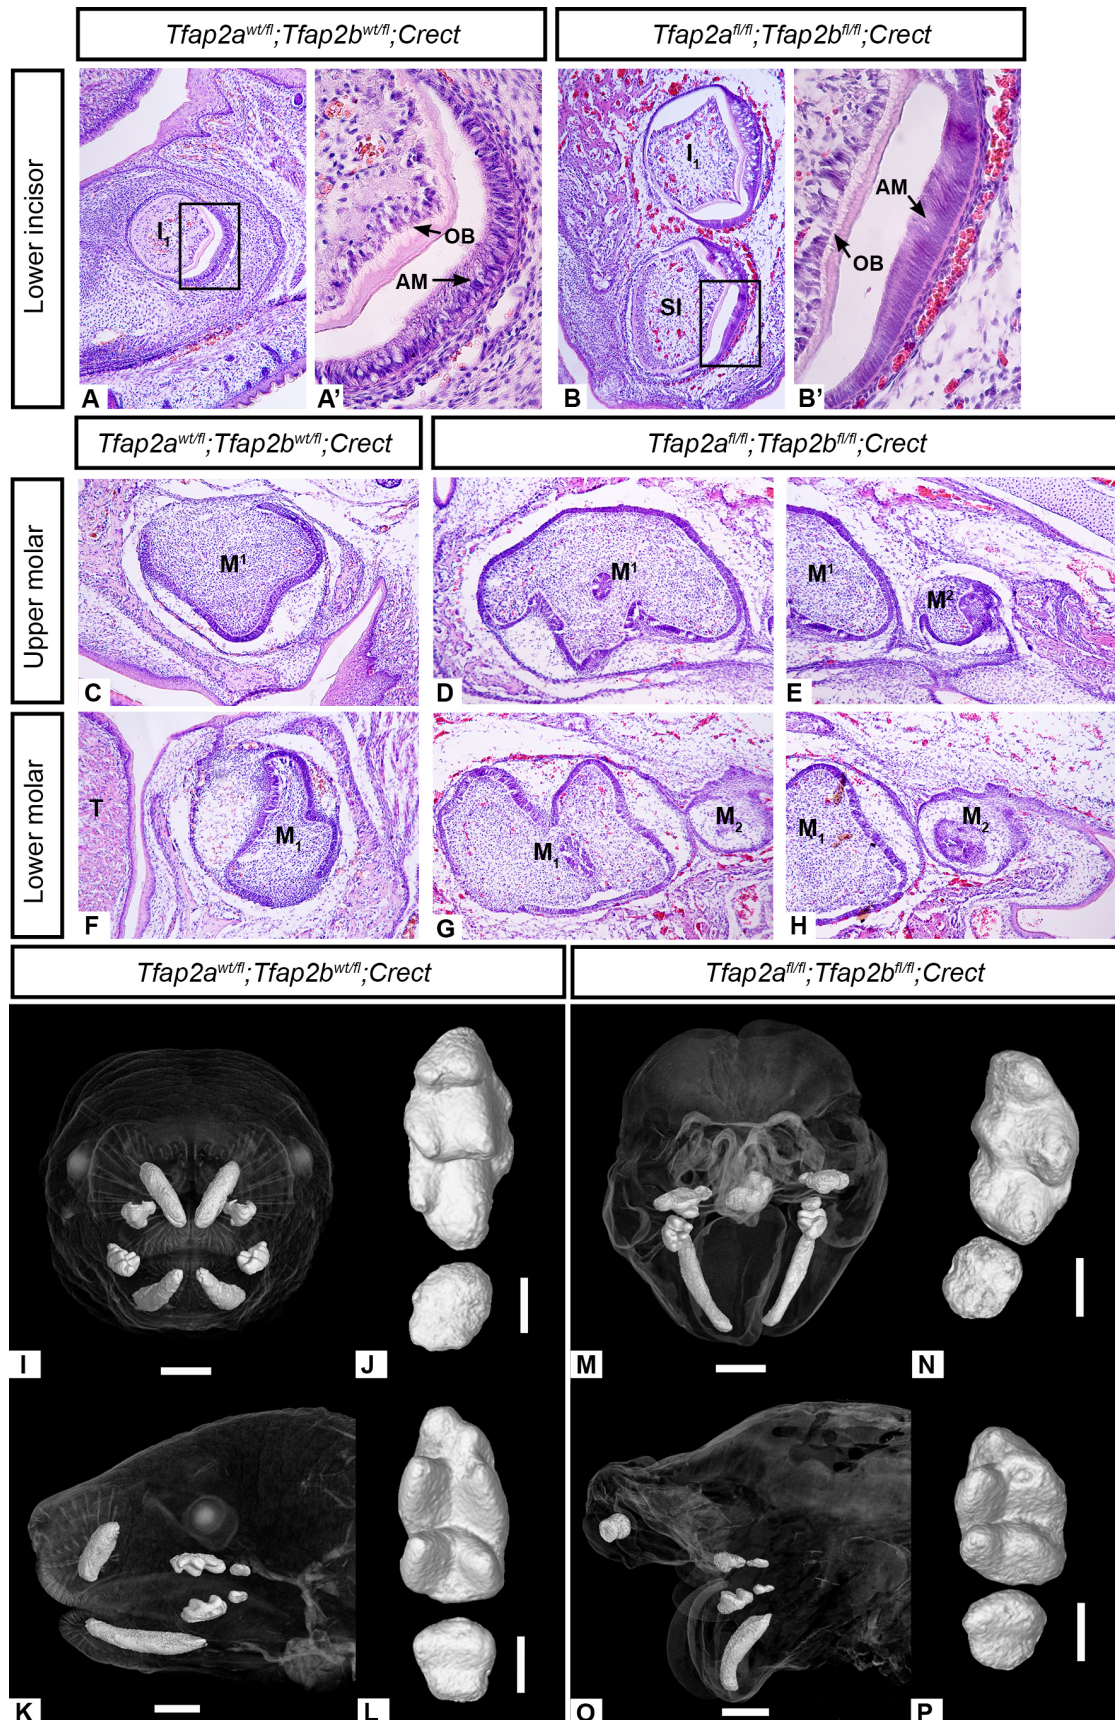

1009 **Figure 5. Duplicated lower incisors in E18.5 *Tfap2a*<sup>fl/fl</sup>;*Tfap2b*<sup>fl/fl</sup>;*Crect* mutant embryos contain ameloblasts**  
1010 **and odontoblasts (B, B') and mutants with only one incisor exhibit ventral curvature of this tooth (M, O).**  
1011 Hematoxylin and eosin staining of frontal cryosections showing that duplicated mutant incisors (B, B') undergo  
1012 cytodifferentiation at the bell stage similar to I<sub>1</sub> and to control embryos (A, A'). In the mutant without duplicated  
1013 incisors, a single ventrally curved lower incisor is present and two small upper incisors are present (M, O). In B and  
1014 B' the mutant mandibles exhibited ventral curvature (as seen in M, O), preventing the lower incisors and the upper  
1015 and lower molars from being obtained in the same tissue sections, as in the controls. To ensure comparable planes of  
1016 section with the controls, mutant hemi-mandibles were tilted backwards during embedding such that the sections  
1017 through the lower incisors were taken through the anterior-most aspect of the mandible (true frontal plane). Note  
1018 that only the right or left side of each frontal section is shown. Images taken of the embryos' right side (A, A', C, F,  
1019 G, H) have been mirrored to match images taken of the left side. All histological images taken at 10X magnification.  
1020 **3-D reconstructions from  $\mu$ CT data show that first and second molars develop in embryos lacking epithelial**  
1021 **expression of *Tfap2a* and *Tfap2b* (D, E, G, H) and the cusp patterns on M<sup>1-2</sup> (N) and M<sub>1-2</sub> (P) look similar to**  
1022 **the control (J: M<sup>1-2</sup>; L: M<sub>1-2</sub>).** Note that first molars are at the top and second molars are at the bottom. The mutant  
1023 molars appear slightly shorter anterior-posteriorly than the control but all the main cusps are present. The apparent  
1024 medial displacement of M<sup>2</sup>/<sub>2</sub> relative to M<sup>1</sup>/<sub>1</sub> in the mutant histological sections (E, H) is likely due to a slightly  
1025 offset plane of section resulting from the cleft palate and mandible in the mutants. A-H taken at 10X; A', B' taken at  
1026 40X magnification. Scale bars are 1mm (I, K, M, O), and 0.3mm (J, L, N, P). AM: ameloblasts, OB: odontoblasts,  
1027 SI: supernumerary incisor, T: tongue.

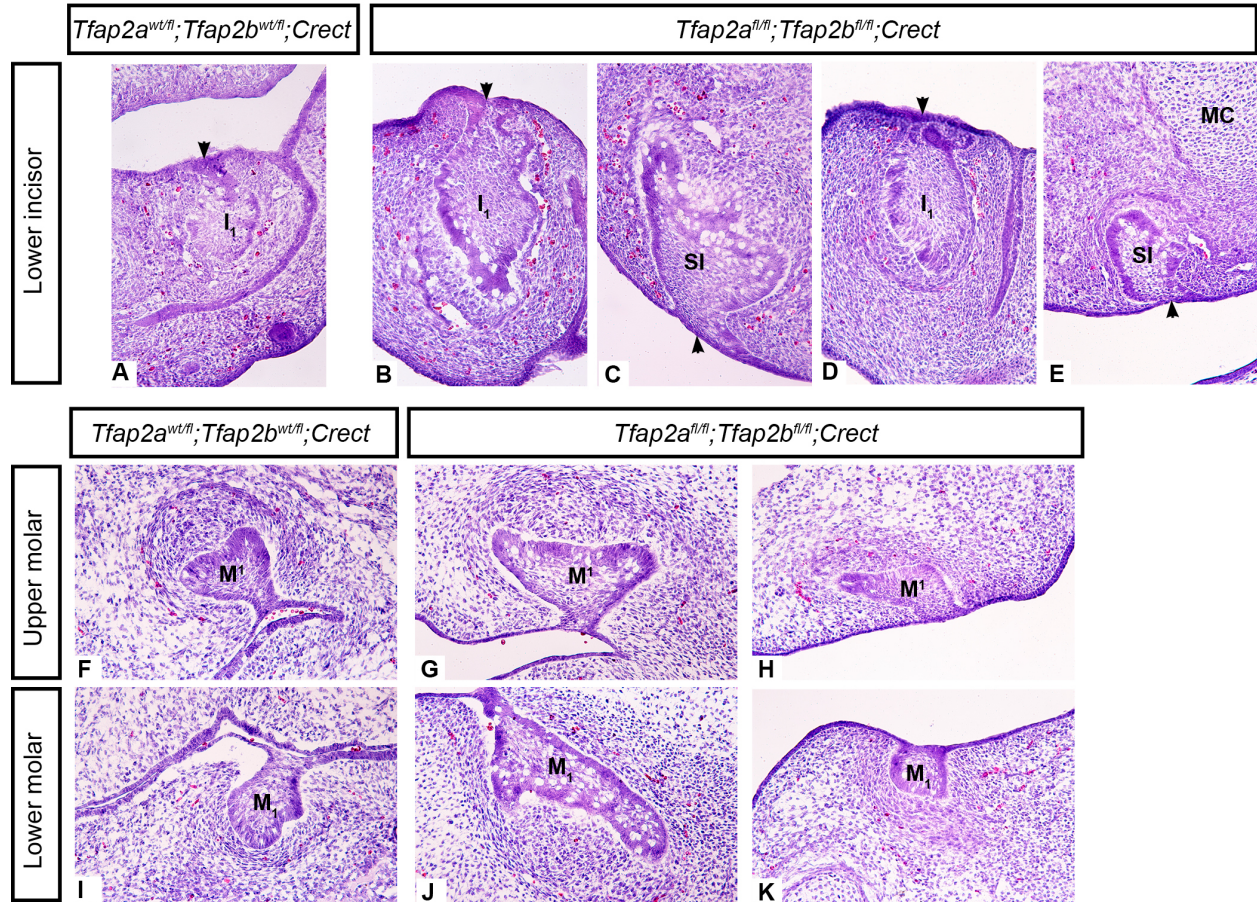

1028  
 1029 **Figure 6. Supernumerary lower incisors are visible at E14.5 tethered to the ventral surface epithelium in**  
 1030 ***Tfap2a<sup>fl/fl</sup>; Tfap2b<sup>fl/fl</sup>; Crect* mutant embryos.** Hematoxylin and eosin staining of frontal cryosections show that  
 1031 supernumerary incisors are ventral and slightly posterior to  $I_1$  at this stage. Representative sections of incisors from  
 1032 2 individuals are shown (B+C, D+E). Note the attachment of the supernumerary incisors to the ventral epithelium  
 1033 (C, E, arrowheads) while  $I_1$  in the mutants (B, D) and controls (A) is attached to the dorsal dental lamina  
 1034 (arrowheads). Molars in mutant embryos vary slightly among individuals from early cap (H, K) to late cap stage (G,  
 1035 J). Aberrant appearance of molar teeth in frontal sections of *Tfap2* mutant embryos may be due to slight  
 1036 displacement of the molars along the medial-lateral axis relative to the plane of section as a result of cleft palate. SI:  
 1037 supernumerary incisor, MC: Meckel's cartilage. Note that only the right or left side of each frontal section is shown.  
 1038 Images taken of the embryos' right side (A, G, H, J, K) have been mirrored to match images taken of the left side.  
 1039 Images taken at 20X magnification.

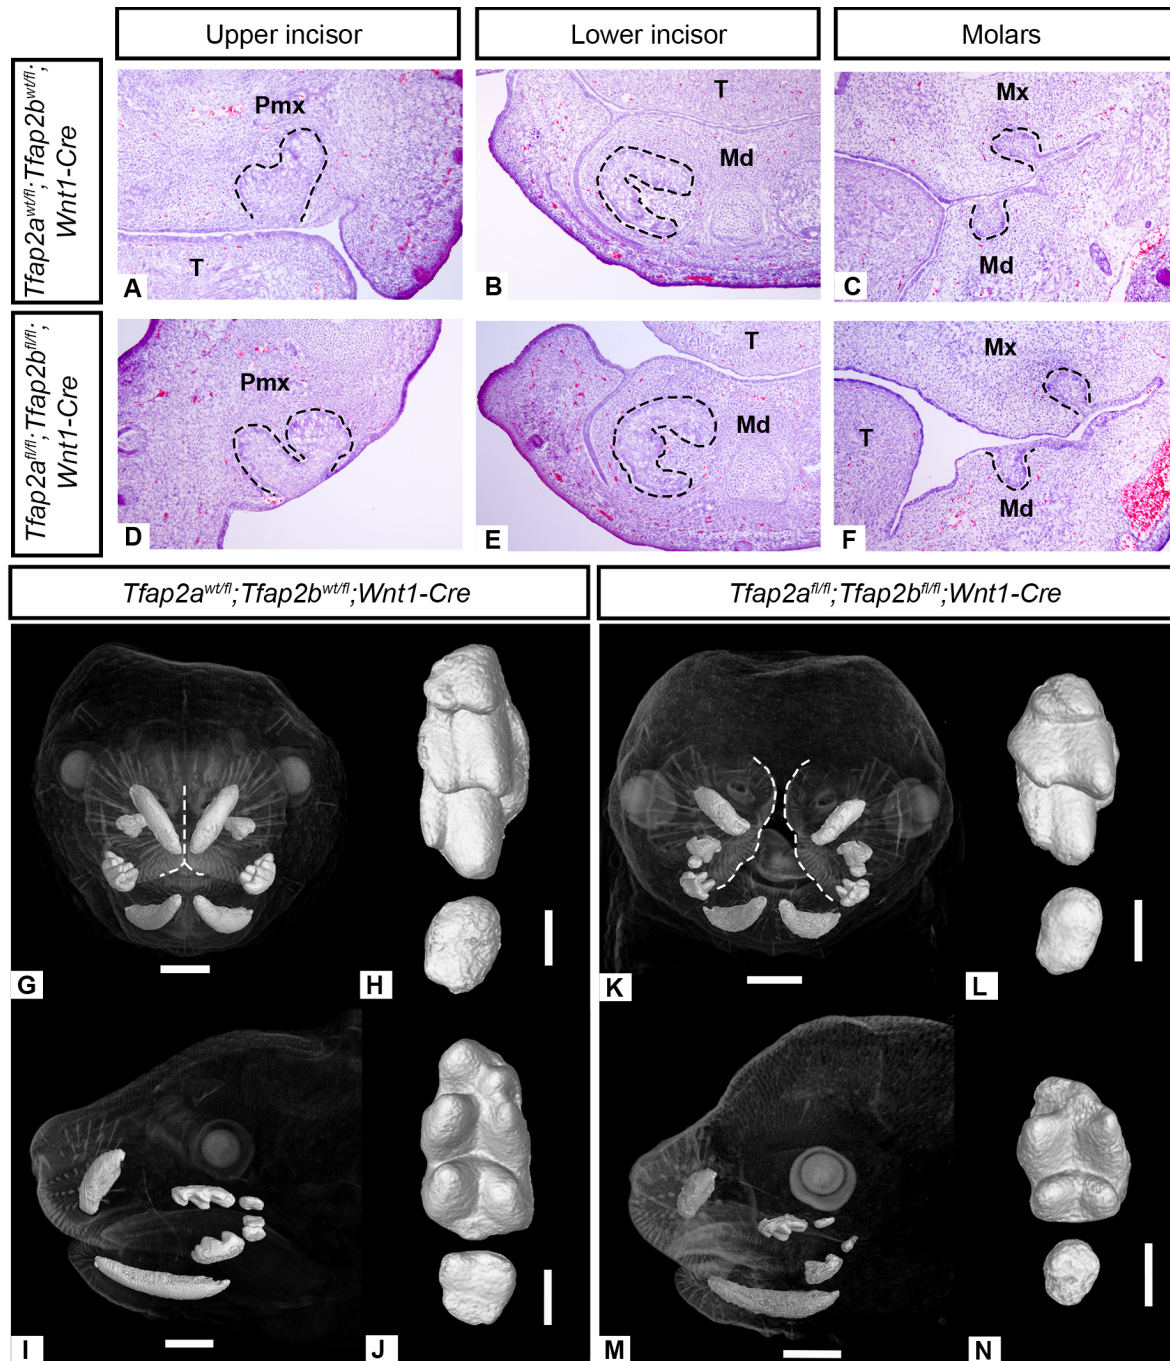

1040  
 1041 **Figure 7. Incisors and molars in *Tfap2a*<sup>fl/fl</sup>;*Tfap2b*<sup>fl/fl</sup>;*Wnt1-Cre* embryos lacking *Tfap2a* and *Tfap2b* expression**  
 1042 **in the CNCC-derived mesenchyme lack major morphological defects based on histology (A-F) and  $\mu$ CT data**  
 1043 **(G-N). Hematoxylin and eosin stained cryosections in the frontal plane showing cap stage (E14.5) incisors (A, B, D,**  
 1044 **E) and molars (C, F) look similar in the mutant (D-F) and the control (A-C) embryos. Note that only the right or left**  
 1045 **side of each frontal section is shown. An image taken of the embryos' right side (C) has been mirrored to match the**  
 1046 **corresponding images of the left side. Due to the clefted palate, the anterior frontal section (D) is angled on the**  
 1047 **medial aspect of the premaxilla. 3-D reconstructions of  $\mu$ CT data show that the upper molars (L: M<sup>1-2</sup>) and lower**  
 1048 **molars (N: M<sub>1-2</sub>) in the mutant appears shorter compared to the control (H: M<sup>1-2</sup>; J: M<sub>1-2</sub>) but all major cusps are**  
 1049 **present. Note the midface cleft in the mutant (K) outlined in white, compared to the control (G). A-F taken at 10X**  
 1050 **magnification. Scale bars are 1mm (G, I, K, M) and 0.3mm (H, J, L, N). Pmx: premaxilla, Mx: maxilla, Md:**  
 1051 **mandible, T: tongue.**

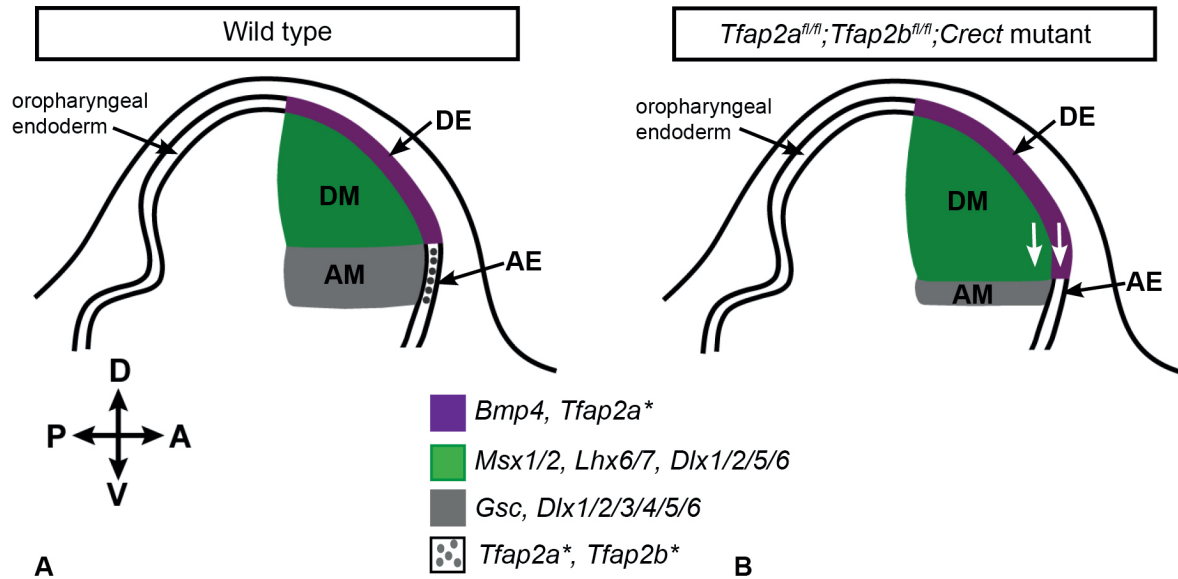

1052  
1053  
1054  
1055  
1056  
1057  
1058  
1059  
1060  
1061  
1062  
1063

**Figure 8. Model for development of duplicated lower incisors in mice lacking *Tfap2a* and *Tfap2b* expression in the epithelium.** Schematic drawing of a sagittal section through a mouse mandible at E10.5, showing the incisor (medial) region for the wild type (A) and the mutant (B). In this model, loss of function of *Tfap2a* and *Tfap2b* in the epithelium leads to dorsoventral mis-patterning in the anterior aspect of the mandible. We hypothesize that this perturbation of the dorsoventral axis results in ventral expansion of the odontogenic domain into the aboral epithelium and mesenchyme (white arrows), perhaps via expansion of *Bmp4*, *Lhx6/7*, *Msx1/2* expression domains. In our model, ventral expansion of the odontogenic domain could result in the initiation of ectopic tooth buds that were limited to the anterior (incisor) region of the developing mandible, thereby leaving the molar buds unaffected, as observed in the epithelium-specific *Tfap2a/Tfap2b* mutants. Asterisks indicate genes that have been deleted in the mutant embryos. DE: dental epithelium, DM: dental mesenchyme, AE: aboral (surface) epithelium, AM: aboral mesenchyme.
